# Supplementary material for: Unravelling the mechanisms linking cultural ecosystem services and human wellbeing
Source: Research Square preprint supplement (doi:10.21203/rs.3.rs-1147200/v1), 2021-12-07
Supplement: Supplementary file 1 [file 250106c0c95e930210dffa9a.pdf]

# Supplementary Information for

## Unravelling the mechanisms linking cultural ecosystem services and human wellbeing

**Table S1: Coding for meta-data extraction**

| Variable                                            | Details                                                 | Options                                                                                                                                                                                                                                                                                                                   | Comments                                                                 |
|-----------------------------------------------------|---------------------------------------------------------|---------------------------------------------------------------------------------------------------------------------------------------------------------------------------------------------------------------------------------------------------------------------------------------------------------------------------|--------------------------------------------------------------------------|
| <b>General study characteristics: Code by paper</b> |                                                         |                                                                                                                                                                                                                                                                                                                           |                                                                          |
| Geography                                           | Geographical focus of the reported studies?             |                                                                                                                                                                                                                                                                                                                           | Longitude and latitude of the studied sites, extracted by Google Map     |
| Type of ecosystem*                                  | What type of ecosystem is discussed in the document?    | 1 = Forest & woodland<br>2 = Mediterranean<br>3 = Arctic & mountain tundra<br>4 = Grassland<br>5 = Desserts and scrublands<br>6 = wetlands<br>7 = Inland water<br>8 = Ocean & marine<br>9 = Urban & semi-urban<br>10 = Cultivated areas<br>11 = Aquaculture<br>12 = Coastal areas<br>13 = General landscape<br>14 = Other | Follow classification of ecosystem of IPBES evaluation assessment report |
| Research type                                       | What is the research type?                              | 1 = Qualitative<br>2 = Quantitative<br>3 = Mixed method                                                                                                                                                                                                                                                                   |                                                                          |
| Research objective                                  | What is the research objective?                         | 1 = Assessment<br>2 = Design and intervene for resource management<br>3 = Policy design<br>4 = Perceptual study<br>5 = Mapping services<br>6. Other                                                                                                                                                                       |                                                                          |
| Participants role                                   | What is the role of the participants?                   | 1 = Information provider<br>2 = Consultation<br>3 = Co-designing<br>4 = Not applicable<br>5 = Other                                                                                                                                                                                                                       |                                                                          |
| Temporal scale                                      | What is the temporal scale of the research?             | 1 = Cross-sectional study<br>2 = Longitudinal<br>3 = Mixed                                                                                                                                                                                                                                                                |                                                                          |
| Spatial Scale                                       | What is the geographical scale of the research?         | 1 = Local<br>2 = Regional<br>3 = Regional<br>4 = Global                                                                                                                                                                                                                                                                   |                                                                          |
| Stakeholder engagement                              | What kind of stakeholders are engaged in the discussion | 1 = Local communities<br>2 = Private sector<br>3 = Government<br>4 = NGOs<br>5 = Tourists<br>6 = Experts and Researchers<br>7 = Indigenous communities                                                                                                                                                                    |                                                                          |

|                                                                      |                                                               |                                                                                                                                                                                                                                                                                                                                           |
|----------------------------------------------------------------------|---------------------------------------------------------------|-------------------------------------------------------------------------------------------------------------------------------------------------------------------------------------------------------------------------------------------------------------------------------------------------------------------------------------------|
|                                                                      |                                                               | 8 = International organisation                                                                                                                                                                                                                                                                                                            |
| Data collection                                                      | What is the method for data collection?                       | Open text                                                                                                                                                                                                                                                                                                                                 |
| Data analysis                                                        | What is the method for data analysis?                         | Open text                                                                                                                                                                                                                                                                                                                                 |
| Framework                                                            | What is the theoretical framework?                            | Open text                                                                                                                                                                                                                                                                                                                                 |
| Discipline                                                           | From what academic discipline the paper belongs to            | Open text                                                                                                                                                                                                                                                                                                                                 |
| <b>Contribution of CES to human well-being (code by observation)</b> |                                                               |                                                                                                                                                                                                                                                                                                                                           |
| Type of cultural ecosystem service*                                  | What type of CES does the paper mention?                      | 1 = Recreational and tourism<br>2 = Aesthetic value<br>3 = Cultural heritage/cultural diversity<br>4 = Spiritual value<br>5 = Social relations<br>6 = Sense of place<br>7 = Educational value<br>8 = Knowledge system<br>9 = Inspiration<br>10 = Other                                                                                    |
| State of CES                                                         | What is the change in CES?                                    | 1 = Significant degradation<br>2 = Moderate degradation<br>3 = Remain the same<br>4 = Moderate improvement<br>5 = Significant improvement<br>6 = Not mentioned                                                                                                                                                                            |
|                                                                      | What is the reason for the change?                            | Describe in text                                                                                                                                                                                                                                                                                                                          |
| Beneficiary*                                                         | What is the affected group?                                   | 1 = Local community<br>2 = Farmers & fisheries<br>3 = Private sector<br>4 = Government<br>5 = Tourists<br>6 = Indigenous community<br>7 = Researchers and students<br>8 = Other                                                                                                                                                           |
| Well-being*                                                          | Which constituent of human well-being that CES contribute to? | 1 = Economic well-being<br>2 = Mental health<br>3 = Physical health<br>4 = Spirituality<br>5 = Learning & capability<br>6 = Inspiration & fulfilment of imagination<br>7 = Certainty, sense of control and security<br>8 = Identity & autonomy<br>9 = Connectedness & belonging<br>10 = Cultural fulfilment<br>11 = Subjective well-being |
| Channels of interaction*                                             | What channel of human interaction with nature?                | 1 = Cultural practices<br>2 = Form<br>3 = Intellectual practices<br>4 = Spiritual practices                                                                                                                                                                                                                                               |
| Type of mechanism*                                                   | What type of mechanism?                                       | 1 = Cognitive<br>2 = Creative<br>3 = Intuitive<br>4 = Retrospective<br>5 = Regenerative<br>6 = Communicative                                                                                                                                                                                                                              |

|                      |                                                      |                                                                                                                                                                                                  |
|----------------------|------------------------------------------------------|--------------------------------------------------------------------------------------------------------------------------------------------------------------------------------------------------|
|                      |                                                      | 7 = Evolutive<br>8 = Formative<br>9 = Transcendentive<br>10 = Satisfactive<br>11 = Cohesive<br>12 = Remunerative<br>13 = Transactive<br>14 = Destructive<br>15 = Irritative<br>16 = Apprehensive |
|                      | Describe mechanism in text?                          |                                                                                                                                                                                                  |
| Direction of impact* | What is the direction of impact on human well-being  | 1 = Negative impact<br>2 = two-way impact<br>3 = Positive impact<br>4 = Can't conclude                                                                                                           |
| Magnitude of impact* | What is the magnitude of impact on human well-being? | 1. Low<br>2. High<br>3. Can't conclude                                                                                                                                                           |
| Outcome of impact    | What is the outcome of impact on human well-being    | 1 = Current state<br>2 = Future state                                                                                                                                                            |

Note: \* are the variables that were used for Latent Class Analysis.

**Table S2: Definition of terminology in this review (followed definition of Millennium Ecosystem Assessment Framework)**

| Type of CES                  | Definition                                                                                                                                                                                                                                                                                                                                                       |
|------------------------------|------------------------------------------------------------------------------------------------------------------------------------------------------------------------------------------------------------------------------------------------------------------------------------------------------------------------------------------------------------------|
| Recreation & tourism service | Ecosystems and nature provide places where people can come for relaxation, recreation, enjoyment and tourism activities                                                                                                                                                                                                                                          |
| Aesthetic value              | Nature provides a great source of aesthetic pleasure for human. People find beauty in nature as reflected in many aspects of human behaviour such as their choice for housing location, their use of flowers for decoration, or their support for scenic views.                                                                                                  |
| Cultural heritage value      | Ecological phenomena are entangled in processes of human identities formation. Ecosystem plays an important role in forming the way people understand themselves and the relationship they have with the world around them. Interactions with ecosystem exist in people past memories, form their lifestyles, and shape their value system and cultural heritage |
| Spiritual value              | Some people feel something greater than themselves in nature and search for spiritual connection to their environment. Ecosystem is often closed attached with this orientation in time and space in which spiritual values are placed on certain landscape (landfall and mountains) and species (sacred plants and animals).                                    |
| Social relations             | Nature provides a setting where people engage with each other and establish different forms of social relations.                                                                                                                                                                                                                                                 |
| Sense of place               | The close relationship people have with nature consequently develops feeling of attachment and belonging associated with the place                                                                                                                                                                                                                               |
| Educational value            | Ecosystems and their components and processes provide the basis for both formal and informal education in many societies.                                                                                                                                                                                                                                        |
| Knowledge system             | Ecosystems and nature influence the types of knowledge systems developed by different cultures.                                                                                                                                                                                                                                                                  |
| Inspiration                  | Nature inspires unlimited range of artistic and cultural expressions including music, books, folklore, national symbol and architecture                                                                                                                                                                                                                          |
| Other                        | Bequest, intrinsic and existence value<br>Authentic wilderness                                                                                                                                                                                                                                                                                                   |

**Table S3. Quality criteria for reviewed studies, adopted from Mupepele et al.**

| Quality checklist question                                                                                                                               | Score<br>Yes=1, No=0 |
|----------------------------------------------------------------------------------------------------------------------------------------------------------|----------------------|
| <b>INTERNAL VALIDITY</b>                                                                                                                                 |                      |
| <i>Research aim</i>                                                                                                                                      |                      |
| 1. Does the study address a clearly focused question?                                                                                                    |                      |
| 2. Does the question match the answer?                                                                                                                   |                      |
| <i>Data collection</i>                                                                                                                                   |                      |
| 3. Was the population/area of interest defined in space, time and size?                                                                                  |                      |
| 4. Selection bias: Was the sample area representative for the population defined?                                                                        |                      |
| 5. Was the sample size appropriate?                                                                                                                      |                      |
| 6. Was probability/random sampling used for constructing the sample?                                                                                     |                      |
| 7. If secondary data were used, did an evaluation of the original data take place?                                                                       |                      |
| 8. If data collection took place in form of a questionnaire, was it pre-tested/piloted?                                                                  |                      |
| 9. Were the data collection methods described in sufficient detail to permit replication?                                                                |                      |
| <i>Analysis</i>                                                                                                                                          |                      |
| 10. Were the statistical/analytical methods described in sufficient detail to permit replication?                                                        |                      |
| 11. Is the choice of statistical/analytical methods appropriate and/or justified?                                                                        |                      |
| 12. Was uncertainty assessed and reported?                                                                                                               |                      |
| <i>Results and Conclusions</i>                                                                                                                           |                      |
| 13. Do the data support the outcome?                                                                                                                     |                      |
| 14. Magnitude of effect: Is the effect large, significant and/or without large uncertainty?                                                              |                      |
| 15. Are all variables and statistical measures reported?                                                                                                 |                      |
| 16. Attrition bias: Are non-response/drop-outs given and is their impact discussed?                                                                      |                      |
| <b>DESIGN-SPECIFIC ASPECTS</b>                                                                                                                           |                      |
| <i>Review</i>                                                                                                                                            |                      |
| 17. Is there a low probability of publication bias?                                                                                                      |                      |
| 18. Is the review based on several strong-evidence individual studies?                                                                                   |                      |
| 19. Do the studies included respond to the same question?                                                                                                |                      |
| 20. Are results between individual studies consistent and homogeneous?                                                                                   |                      |
| 21. Was the literature searched in a systematic and comprehensive way?                                                                                   |                      |
| 22. Was a meta-analysis included?                                                                                                                        |                      |
| 23. Were appropriate a priori study inclusion/exclusion criteria defined?                                                                                |                      |
| 24. Did at least two people select studies and extract data?                                                                                             |                      |
| <b>FOCUS-SPECIFIC ASPECTS</b>                                                                                                                            |                      |
| <i>Quantification</i>                                                                                                                                    |                      |
| 25. Is the unit of the quantification measurement appropriate?                                                                                           |                      |
| 26. Was temporal change (e.g. annual or long-term) of quantities measured (e.g. species abundance or an ecosystem service) discussed?                    |                      |
| <i>Valuation</i>                                                                                                                                         |                      |
| 27. If discounting of future costs and outcomes is necessary, was it performed correctly?                                                                |                      |
| 28. If aggregate economic values for a population were estimated, was this estimation consistent with the sampling and the definition of the population? |                      |

Note: For each criterion answered with a 'yes' the study receives one point, else it receives zero points. If a question is not applicable for the specific study it may be left out, especially for design-specific and focus-specific aspects. Based on the aggregate score studies are characterized as having (a) Weak evidence if score is <24%; (b) Moderate evidence if score is 25%-49%; (c) Strong evidence if score is 50%-74%; and (d) Very strong evidence if score >75%.

**Table S4: Summary of the characteristics and foci of reviewed studies**

|                                              | Total (Number of studies) | Percentage (%) |
|----------------------------------------------|---------------------------|----------------|
| <b>Type of ecosystem</b>                     |                           |                |
| Forest & woodland                            | 61                        | 20.2           |
| Mediterranean                                | 3                         | 1              |
| Arctic & mountain tundra                     | 1                         | 0.3            |
| Grassland                                    | 5                         | 1.6            |
| Desserts and scrublands                      | 2                         | 0.7            |
| wetlands                                     | 10                        | 3.3            |
| Inland water                                 | 37                        | 12.3           |
| Ocean & marine                               | 23                        | 7.6            |
| Urban & semi-urban                           | 79                        | 26.2           |
| Cultivated areas                             | 19                        | 6.3            |
| Aquaculture                                  | 5                         | 1.6            |
| Coastal areas                                | 27                        | 8.9            |
| General landscape                            | 20                        | 6.6            |
| Other                                        | 9                         | 2.3            |
| <b>Research type</b>                         |                           |                |
| Qualitative                                  | 60                        | 20             |
| Quantitative                                 | 126                       | 41.8           |
| Mixed method                                 | 115                       | 38.2           |
| <b>Research objective</b>                    |                           |                |
| Assessment                                   | 118                       | 39.2           |
| Design and intervene for resource management | 24                        | 8              |
| Policy design                                | 10                        | 3.3            |
| Perceptual study                             | 109                       | 36.2           |
| Mapping services                             | 33                        | 11             |
| Other                                        | 7                         | 2.3            |
| <b>Temporal scale</b>                        |                           |                |
| Cross-sectional study                        | 231                       | 76.8           |
| Longitudinal                                 | 70                        | 23.1           |
| Mixed                                        | 0                         | 0              |
| <b>Spatial scale</b>                         |                           |                |
| Local                                        | 246                       | 82.8           |
| Regional                                     | 25                        | 8.3            |
| Regional                                     | 19                        | 6.3            |
| Global                                       | 11                        | 3.6            |

**Table S5: List of countries for the study sites**

| Country      | Number | Percentage |
|--------------|--------|------------|
| Argentina    | 2      | 0.7        |
| Australia    | 14     | 5.1        |
| Austria      | 3      | 1.1        |
| Bangladesh   | 2      | 0.7        |
| Benin        | 1      | 0.4        |
| Bhutan       | 3      | 1.1        |
| Brazil       | 5      | 1.8        |
| Burkina Faso | 1      | 0.4        |
| Cambodia     | 1      | 0.4        |
| Canada       | 7      | 2.5        |
| Chile        | 5      | 1.8        |
| China        | 19     | 6.9        |
| Colombia     | 3      | 1.1        |
| Cuba         | 1      | 0.4        |
| Egypt        | 1      | 0.4        |
| Finland      | 6      | 2.2        |
| France       | 2      | 0.7        |
| Germany      | 13     | 4.7        |
| Ghana        | 1      | 0.4        |
| Greece       | 3      | 1.1        |
| Hawaii       | 7      | 2.5        |
| Hongkong     | 1      | 0.4        |
| Hungary      | 4      | 1.4        |
| India        | 7      | 2.5        |
| Indonesia    | 1      | 0.4        |
| Iran         | 3      | 1.1        |
| Ireland      | 1      | 0.4        |
| Italy        | 10     | 3.6        |
| Japan        | 8      | 2.9        |
| Lebanon      | 1      | 0.4        |
| Lithuania    | 1      | 0.4        |
| Kenya        | 1      | 0.4        |
| Madagascar   | 1      | 0.4        |
| Malaysia     | 6      | 2.2        |
| Mexico       | 3      | 1.1        |
| Mozambique   | 1      | 0.4        |
| Myanmar      | 2      | 0.7        |
| Nepal        | 1      | 0.4        |
| Netherlands  | 2      | 0.7        |
| Nigeria      | 1      | 0.4        |

|                  |    |      |
|------------------|----|------|
| Norway           | 5  | 1.8  |
| Papua New Guinea | 1  | 0.4  |
| Peru             | 1  | 0.4  |
| Philippines      | 1  | 0.4  |
| Poland           | 3  | 1.1  |
| Portugal         | 3  | 1.1  |
| Romania          | 2  | 0.7  |
| Serbia           | 1  | 0.4  |
| Singapore        | 1  | 0.4  |
| Slovakia         | 4  | 1.4  |
| South Africa     | 7  | 2.5  |
| Spain            | 16 | 5.8  |
| Sweden           | 5  | 1.8  |
| Switzerland      | 2  | 0.7  |
| Taiwan           | 1  | 0.4  |
| Thailand         | 1  | 0.4  |
| Turkey           | 2  | 0.7  |
| United Kingdom   | 28 | 10.1 |
| United States    | 34 | 12.3 |
| Venezuela        | 1  | 0.4  |
| Zimbabwe         | 1  | 0.4  |
| Vietnam          | 1  | 0.4  |

---

**Table S6: Academic disciplines in which the paper belongs to**

| Discipline                                  | 2000 -<br>2005 | 2006 -<br>2010 | 2011 -<br>2015 | 2016 -<br>2020 | Total |
|---------------------------------------------|----------------|----------------|----------------|----------------|-------|
| Environmental psychology                    | 1              |                | 9              | 49             | 59    |
| Agriculture science                         |                |                | 2              | 5              | 7     |
| Anthropology                                |                | 2              | 2              | 3              | 7     |
| Architecture                                |                |                | 1              | 0              | 1     |
| Biodiversity Conservation                   | 1              |                | 4              | 7              | 12    |
| Biology                                     | 1              |                |                |                | 1     |
| Cultural studies                            |                |                |                | 1              | 1     |
| Development studies                         | 1              |                | 2              | 2              | 5     |
| Ecology                                     | 2              |                | 8              | 19             | 29    |
| Economics                                   | 1              | 1              | 3              | 4              | 9     |
| Education                                   |                | 1              |                |                | 1     |
| Energy & Fuel Sciences                      |                |                |                | 1              | 1     |
| Engineering                                 |                |                | 1              | 2              | 3     |
| Entomology                                  |                |                | 1              |                | 1     |
| Environmental sciences                      | 2              | 3              | 24             | 70             | 99    |
| Environmental policy                        |                |                | 4              | 14             | 18    |
| Environmental Studies                       | 2              | 6              | 16             | 82             | 106   |
| Forestry                                    |                |                | 1              | 34             | 35    |
| Geography                                   | 1              | 2              | 5              | 14             | 22    |
| Geosciences                                 |                | 1              | 1              | 4              | 6     |
| Green, sustainable science & technology     | 1              |                | 1              | 20             | 22    |
| Health                                      | 1              | 1              |                |                | 2     |
| hospitality, leisure, sport & tourism       |                |                | 2              | 5              | 7     |
| International relations                     |                |                | 2              | 2              | 4     |
| Management of Natural resource              |                |                | 8              | 27             | 35    |
| Marine & Freshwater biology                 |                |                | 4              | 9              | 13    |
| Medicines                                   |                |                | 1              |                | 1     |
| Multidisciplinarity                         |                | 2              | 4              | 29             | 35    |
| Pharmacology & Pharmacy                     |                |                | 2              | 1              | 3     |
| Plant Sciences                              |                | 1              | 2              | 1              | 4     |
| Psychology                                  |                | 1              | 1              | 3              | 5     |
| Public, Environmental & occupational health |                |                | 4              | 6              | 10    |
| Regional & Urban planning                   | 2              | 1              | 5              | 12             | 20    |
| Remote sensing                              |                | 1              |                |                | 1     |
| Sociology                                   | 1              | 2              | 3              | 5              | 11    |
| Urban studies                               | 1              | 1              | 3              | 28             | 33    |
| Water resources                             |                |                | 2              | 4              | 6     |
| Agronomy                                    |                |                | 1              |                | 1     |
| Oceanography                                |                |                | 2              | 4              | 6     |



**Table S7: Data collection and data analysis**

|                                | Number of studies | Percentage(%) |
|--------------------------------|-------------------|---------------|
| <b>Data collection tool</b>    |                   |               |
| Interview                      | 74                | 24.6          |
| Survey                         | 145               | 48.2          |
| Observation                    | 8                 | 2.7           |
| Workshop                       | 13                | 4.3           |
| Participatory mapping          | 13                | 4.3           |
| Focus group discussion         | 16                | 5.3           |
| Social media-based             | 13                | 4.3           |
| Secondary data                 | 55                | 18.3          |
| Geospatial data                | 32                | 10.6          |
| Ethnographic study             | 2                 | 0.7           |
| Health experiments             | 2                 | 0.7           |
| Photovoice                     | 1                 | 0.3           |
| <b>Data analysis tool</b>      |                   |               |
| Narrative                      | 119               | 39.5          |
| Descriptive statistics         | 22                | 7.3           |
| Inferential statistics         | 163               | 54.2          |
| Case study                     | 9                 | 3             |
| Grounded theory                | 2                 | 0.7           |
| Economic evaluation techniques | 25                | 8.3           |
| GIS analysis                   | 4                 | 1.3           |
| Ethnographic analysis          | 12                | 4             |
| Historical analysis            | 4                 | 1.3           |
| Scenario planning              | 5                 | 1.7           |

**Table S8: Relative impacts on individual constituent of human well-being**

| <b>Constituents of human well-being</b>  | <b>Mean (Negative)</b> | <b>Standard Error (Negative)</b> | <b>Mean (Positive)</b> | <b>Standard Error (Positive)</b> |
|------------------------------------------|------------------------|----------------------------------|------------------------|----------------------------------|
| Certainty, Sense of Control and Security | -1.88                  | 0.44                             | 1.86                   | 0.072                            |
| Connectedness and belonging              | -1.83                  | 0.17                             | 1.92                   | 0.03                             |
| Cultural fulfillment                     | -1.62                  | 0.31                             | 1.83                   | 0.08                             |
| Economic well-being                      | -1.96                  | 0.08                             | 1.88                   | 0.09                             |
| Identity & autonomy                      | -1.80                  | 0.06                             | 1.84                   | 0.042                            |
| Inspiration & Fulfillment of Imagination | -1.5                   | 0.32                             | 1.72                   | 0.03                             |
| Learning & capability                    | -1.75                  | 0.25                             | 1.91                   | 0.044                            |
| Mental health                            | -1.98                  | 0.02                             | 1.99                   | 0.014                            |
| Physical health                          | -1.98                  | 0.02                             | 1.97                   | 0.02                             |
| Spirituality                             | -1.94                  | 0.056                            | 1.79                   | 0.05                             |
| Subjective well-being                    | -1.83                  | 0.075                            | 1.71                   | 0.34                             |

**Table S9: Relative impact of individual mechanism to human well-being**

| Mechanism     | Mean   | SE    | Mechanism    | Mean   | SE    | Mechanism       | Mean  | SE    |
|---------------|--------|-------|--------------|--------|-------|-----------------|-------|-------|
| Apprehensive  | -1.881 | 0.120 | Destructive  | -1.925 | 0.031 | Regenerative    | 1.953 | 0.018 |
| Cognitive     | 1.490  | 0.310 | Evolutionary | 1.936  | 0.023 | Renumerative    | 1.725 | 0.117 |
| Cohesive      | 1.975  | 0.030 | Formative    | 1.802  | 0.110 | Retrospective   | 1.897 | 0.043 |
| Communicative | 1.912  | 0.050 | Intuitive    | 1.942  | 0.024 | satisfactive    | 1.824 | 0.088 |
| Creative      | 1.802  | 0.098 | Irritative   | -1.667 | 0.154 | Transactive     | 1.500 | 0.500 |
|               |        |       |              |        |       | Transcendentive | 1.952 | 0.048 |

**Table S10: Latent Class Analysis fitness tests**

|                               | Fit for 2<br>classes         | Fit for 3<br>classes                         | Fit for 4<br>classes                                         | Fit for 5<br>classes                                                         |
|-------------------------------|------------------------------|----------------------------------------------|--------------------------------------------------------------|------------------------------------------------------------------------------|
| Maximum log-likelihood        | -12450.7                     | -11837.17                                    | -11630                                                       | -11104.02                                                                    |
| AIC                           | 25155.41                     | 24056.34                                     | 23770                                                        | 22846.05                                                                     |
| BIC                           | 25795.11                     | 25018.41                                     | 25054.44                                                     | 24452.86                                                                     |
| Estimated class shares        | Class 1: 41%<br>Class 2: 59% | Class 1: 27%<br>Class 2: 46%<br>Class 3: 37% | Class 1: 28%<br>Class 2: 29%<br>Class 3: 14%<br>Class 4: 29% | Class 1: 11%<br>Class 2: 12%<br>Class 3: 35%<br>Class 4: 15%<br>Class 5: 27% |
| Predicted class<br>membership | Class 1: 41%<br>Class 2: 59% | Class 1: 28%<br>Class: 46%<br>Class 3: 36%   | Class 1: 44%<br>Class 2: 13%<br>Class 3: 12%<br>Class 4: 31% | Class 1: 11%<br>Class 2: 12%<br>Class 3: 35%<br>Class 4: 15%<br>Class 5: 27% |

**Table S11:** The magnitude of impact (high, low) is defined in three dimensions: depth, scale and speed. Any observation which reflects the impact that can meet one of the conditions for high depth/scope/speed is classified as high magnitude impact.

| <b>Dimension of impacts</b> | <b>Extent of impacts</b>                                                                                                                                                                                                                                                                                                                                                                                                                                                                            |
|-----------------------------|-----------------------------------------------------------------------------------------------------------------------------------------------------------------------------------------------------------------------------------------------------------------------------------------------------------------------------------------------------------------------------------------------------------------------------------------------------------------------------------------------------|
| <b>Depth</b>                | <b>Degree to which the impact of CESs on human well-being reflects something new, novel, impressive, and different from the current state</b>                                                                                                                                                                                                                                                                                                                                                       |
| High                        | <ul style="list-style-type: none"> <li>- Associated with transformative and transcendental changes.</li> <li>- May involve radically changing how people perceive their happiness, values, frames, logic, health, and conditions of their well-being.</li> <li>- Interaction with nature may create deep internal reform, a complete change in perception and spiritual value, radical shifts in mind set, identity and relationships, significant impacts on health or economic assets.</li> </ul> |
| Low                         | <ul style="list-style-type: none"> <li>- Reflects incremental and transient impact with limited degree difference in which interaction with nature affects the perceived well-being, underlying values, health, economic assets, or norms.</li> </ul>                                                                                                                                                                                                                                               |
| <b>Scope</b>                | <b>Scale of change – geographic or institutional</b>                                                                                                                                                                                                                                                                                                                                                                                                                                                |
| High                        | <ul style="list-style-type: none"> <li>- Large-scale changes that involve a large area or large population.</li> <li>- May be multi-dimensional, multi-scale or multi-institution.</li> <li>- May lead to a change in perceived well-being, a shift in underlying norms or behaviour an impact on health or economic condition across an entire population.</li> </ul>                                                                                                                              |
| Low                         | <ul style="list-style-type: none"> <li>- Impacts that occurred to an individual or a particular small stakeholder group.</li> </ul>                                                                                                                                                                                                                                                                                                                                                                 |
| <b>Speed</b>                | <b>Time frame in which the impacts occur</b>                                                                                                                                                                                                                                                                                                                                                                                                                                                        |
| High                        | <ul style="list-style-type: none"> <li>- Interaction with nature that creates immediate and instant impacts on people's perceived well-being, health, perception, values, and economic conditions.</li> </ul>                                                                                                                                                                                                                                                                                       |
| Low                         | <ul style="list-style-type: none"> <li>- Interaction with nature that creates impacts on human well-being that are largely slow or take a long time to see the result.</li> </ul>                                                                                                                                                                                                                                                                                                                   |

**SUPPLEMENTARY MATERIAL – 70 pathways linking cultural ecosystem services and human well-being**

**TABLE S12: CULTURAL ECOSYSTEM SERVICES**

| <b>CULTURAL ECOSYSTEM SERVICES</b>             |           |                                                                                                                                                             |                                   |                                        |                     |                                                                                                                                                                                                                                                                                                                                                                                                                                                                                                                                                                                                                                                  |                            |
|------------------------------------------------|-----------|-------------------------------------------------------------------------------------------------------------------------------------------------------------|-----------------------------------|----------------------------------------|---------------------|--------------------------------------------------------------------------------------------------------------------------------------------------------------------------------------------------------------------------------------------------------------------------------------------------------------------------------------------------------------------------------------------------------------------------------------------------------------------------------------------------------------------------------------------------------------------------------------------------------------------------------------------------|----------------------------|
|                                                | <b>No</b> | <b>Interaction with ecosystem through</b>                                                                                                                   | <b>Cultural ecosystem service</b> | <b>Constituent of well-being</b>       | <b>Mechanism</b>    | <b>Mechanism explained in detail</b>                                                                                                                                                                                                                                                                                                                                                                                                                                                                                                                                                                                                             | <b>Direction of impact</b> |
| <b>I. ES contribute to Economic well-being</b> | <b>1</b>  | <b>Cultural practice:</b><br>Nature provides opportunity for playing and exercising, creating and expressing, producing and caring, gathering and consuming | Recreation & tourism              | Economic well-being (collective scale) | <b>Remunerative</b> | The development of nature-based tourism activities can directly or indirectly contribute to the economic growth of the local communities. Examples of the direct contributions are generating revenue by activities such as accommodations, transportation, tour operations, and food and beverage. Indirect contributions could be tourism contributes to reducing poverty, creating jobs, and promoting justice (Salem and El-Shimy, 2012; Rahman, Jiang and Irvine, 2018).<br>Ecosystem service supply and demand, quality and quantity of ecosystem, visitors' environmental perception and their demographics can influence this mechanism. | Positive                   |
|                                                | <b>2</b>  | <b>Form:</b><br>Physical, tangible or measurable aspects of ecosystem                                                                                       | Aesthetic                         | Economic well-being (collective scale) | <b>Remunerative</b> | Beautiful nature and distinct landscape can contribute to the local iconic brand and the important symbol of the region. Economic activities of the local community can be based around this concept. Example: apart from tourism-related activities, the local iconic brand also give values to other local products/investment associated with this symbolism(Khakzad and Griffith, 2016).<br>Local iconic brand, landscape types and characteristics can influence this mechanism                                                                                                                                                             | Positive                   |

|  |          |                                                                                                                                                             |                         |                                                  |                     |                                                                                                                                                                                                                                                                                                                                                                                                                                                                                                                                                                                                                                                                                                                            |          |
|--|----------|-------------------------------------------------------------------------------------------------------------------------------------------------------------|-------------------------|--------------------------------------------------|---------------------|----------------------------------------------------------------------------------------------------------------------------------------------------------------------------------------------------------------------------------------------------------------------------------------------------------------------------------------------------------------------------------------------------------------------------------------------------------------------------------------------------------------------------------------------------------------------------------------------------------------------------------------------------------------------------------------------------------------------------|----------|
|  | <b>3</b> | <b>Cultural practice:</b><br>Nature provides opportunity for playing and exercising, creating and expressing, producing and caring, gathering and consuming | Recreation & tourism    | Economic well-being (individual/household scale) | <b>Remunerative</b> | Many households and business owners earn their main (or additional) source income from nature-based tourism and recreational activities. Example: Money can play an important contributor to poverty alleviation. Increasing household income can be seen as a mechanism to enhance well-being through the capacity to purchase necessary commodities, enhancing education for children, and access healthcare(Dai <i>et al.</i> , 2015)<br>Household livelihood and the level of income influence this mechanism. There is also distinct gender roles in the tourism sector. Women tend to be present in the tourism sector in a limited number of roles, always as an employee rather than as an owner of an enterprise. | Positive |
|  | <b>4</b> | <b>Cultural practice:</b><br>Nature provides opportunity for playing and exercising, creating and expressing, producing and caring, gathering and consuming | Cultural heritage value | Economic well-being (individual/household scale) | <b>Transactive</b>  | For indigenous communities, particular species carries a special cultural heritage value. Species can be utilised as a products suited for exchanges and trades among kins. Example: Yalke (bush onion) is associated with the origins and continuity of Kaytetye people to the north of Arrernte country. Yalke is often traded among kins to sustain the reciprocal relationships essential to the functioning of desert Aboriginal groups(Walsh, Dobson and Douglas, 2013).                                                                                                                                                                                                                                             | Positive |

|                                              |          |                                                                                                                                                             |                      |                                                  |                     |                                                                                                                                                                                                                                                                                                                                                                                                                                                                                                                                                                                                                                                                                                                                                                                                                                        |          |
|----------------------------------------------|----------|-------------------------------------------------------------------------------------------------------------------------------------------------------------|----------------------|--------------------------------------------------|---------------------|----------------------------------------------------------------------------------------------------------------------------------------------------------------------------------------------------------------------------------------------------------------------------------------------------------------------------------------------------------------------------------------------------------------------------------------------------------------------------------------------------------------------------------------------------------------------------------------------------------------------------------------------------------------------------------------------------------------------------------------------------------------------------------------------------------------------------------------|----------|
|                                              | <b>5</b> | <b>Cultural practice:</b><br>Nature provides opportunity for playing and exercising, creating and expressing, producing and caring, gathering and consuming | Knowledge system     | Economic well-being (individual/household scale) | <b>Remunerative</b> | Livelihood practices based on knowledge system mobility can contribute to promoting the economic well-being of the indigenous households. Example: traditional practices of multiple cropping, rain fed agriculture, crop varieties according to native soil conditions and micro climate can tolerate better to various natural stresses. Traditional land use adaptation in the vulnerable and inaccessible mountain slopes has been potential livelihood support to the farmers, ecological health, social and economic well-being of the indigenous community in the Central Himalaya region (Samal, Palni and Agrawal, 2003).<br>Household livelihood can influence this mechanism.                                                                                                                                               | Positive |
| <b>II. CES contribute to Physical health</b> | <b>6</b> | <b>Cultural practice:</b><br>Nature provides opportunity for playing and exercising, creating and expressing, producing and caring, gathering and consuming | Recreation & tourism | Physical health                                  | <b>Regenerative</b> | Ecosystems promote physical health by offering opportunities for physical exercises and fitness activities, and by different recreational activities. Example: Benefits to physical health through interaction with nature include lower body mass index, reduced disease, reduced obesity more vitality, lower somatization level, decreased cognitive decline, reduced blood pressure, heart rate and muscle tensions, improved immune system, increased restoration and healing, and lower mortality risk (Russell <i>et al.</i> , 2013).<br>ES characteristics (quantity and quality), time spent in nature, value and perception on environmental supportiveness, demographic background of people (age, income, gender, education level, ethnicity), accessibility, resource management and policy can influence this mechanism. | Positive |

|  |   |                                                                                                                                                             |                            |                 |                     |                                                                                                                                                                                                                                                                                                                                                                                                                                                                                                                                                                                                                                                                         |          |
|--|---|-------------------------------------------------------------------------------------------------------------------------------------------------------------|----------------------------|-----------------|---------------------|-------------------------------------------------------------------------------------------------------------------------------------------------------------------------------------------------------------------------------------------------------------------------------------------------------------------------------------------------------------------------------------------------------------------------------------------------------------------------------------------------------------------------------------------------------------------------------------------------------------------------------------------------------------------------|----------|
|  | 7 | <b>Form:</b><br>Physical, tangible or measurable aspects of ecosystem                                                                                       | Aesthetic                  | Physical health | <b>Regenerative</b> | The beauty of nature perceived by visual and other sensory experiences can contribute to increasing physical health of people.<br>Example: Viewing beautiful landscapes can lower heart rates, aid recovery and benefit physical health via the mechanism of promoting physical exercises and fitness activities(Smith and Ram, 2017).<br>ES characteristics (quantity and quality), time spent in nature, value and perception on environmental supportiveness, demographic background of people (age, income, gender, education level, ethnicity), accessibility, resource management and policy can influence this mechanism.                                        | Positive |
|  | 8 | <b>Cultural practice:</b><br>Nature provides opportunity for playing and exercising, creating and expressing, producing and caring, gathering and consuming | Biophilia Knowledge system | Physical health | <b>Regenerative</b> | Gardening improve healthy eating style and the nutrients of everyday meals because people can cultivate their vegetables in their yard. Knowledge of animals and plants regarding where, which, what, when and how to eat can also contribute to a better diet and ultimately contribute to good health.<br>Biodiversity around where people live may contribute to greater immunological tolerances. Example: People living in the areas with more green space and gardens tend to report better health(Cox <i>et al.</i> , 2018).<br>Demographic background of people, accessibility to nature, ES characteristics (quantity & quality) can influence this mechanism. | Positive |

|                                             |           |                                                                                                                                                             |                      |                                          |                     |                                                                                                                                                                                                                                                                                                                                                                                                                                                                                                                                                                                                                                                                                                                                                                                                                                                                                                                                   |          |
|---------------------------------------------|-----------|-------------------------------------------------------------------------------------------------------------------------------------------------------------|----------------------|------------------------------------------|---------------------|-----------------------------------------------------------------------------------------------------------------------------------------------------------------------------------------------------------------------------------------------------------------------------------------------------------------------------------------------------------------------------------------------------------------------------------------------------------------------------------------------------------------------------------------------------------------------------------------------------------------------------------------------------------------------------------------------------------------------------------------------------------------------------------------------------------------------------------------------------------------------------------------------------------------------------------|----------|
| <b>III. CES contribute to Mental health</b> | <b>9</b>  | <b>Cultural practice:</b><br>Nature provides opportunity for playing and exercising, creating and expressing, producing and caring, gathering and consuming | Recreation & tourism | Mental health (stress reduction)         | <b>Regenerative</b> | Interaction with nature can help to reduce anxiety, stress and depression, decrease their visits to psychologists, and the intake of antidepressants and sedatives, increase sleeping quality and vitality, decrease cognitive decline, increased ability of recovery and healing from crisis, and reduce mental fatigue and illness. Nature-based therapy and treatment can also be effective to deal with mental issues. Example: Many studies indicate that interaction with nature via recreational activities can improve the mood states, such as reducing anxiety, anger, depression, dejection, hostility, confusion, and fatigue (Russell <i>et al.</i> , 2013; Pittman <i>et al.</i> , 2019).<br>Characteristics of ecosystem, demographic background of people, environmental perception & values, accessibility, proximity to nature, man-made facilities, resource management & policy can influence this mechanism. | Positive |
|                                             | <b>10</b> | <b>Form:</b><br>Physical, tangible or measurable aspects of ecosystem                                                                                       | Aesthetic            | Mental health (relaxation, tranquillity) | <b>Regenerative</b> | The beauty of nature perceived by visual and other sensory experiences can help to achieve peacefulness, calm, tranquility, restfulness, and escapism. Example: Simply interacting with nature creates a feel good factor on people, reduce the negativity of normal life, and improve human mental wellbeing (Egerer <i>et al.</i> , 2019).<br>Characteristics of ecosystem, demographic background of people, environmental perception & values, accessibility, proximity to nature, man-made facilities, resource management & policy can influence this mechanism.                                                                                                                                                                                                                                                                                                                                                            | Positive |



|  |           |                                                                                                                                                             |                                                |                                         |                  |                                                                                                                                                                                                                                                                                                                                                                                                                                                                                                                                                                                                                                                                                                                                                                                                                                                               |          |
|--|-----------|-------------------------------------------------------------------------------------------------------------------------------------------------------------|------------------------------------------------|-----------------------------------------|------------------|---------------------------------------------------------------------------------------------------------------------------------------------------------------------------------------------------------------------------------------------------------------------------------------------------------------------------------------------------------------------------------------------------------------------------------------------------------------------------------------------------------------------------------------------------------------------------------------------------------------------------------------------------------------------------------------------------------------------------------------------------------------------------------------------------------------------------------------------------------------|----------|
|  | <b>11</b> | <b>Spiritual practice:</b><br>Nature provides opportunity for spiritual/religious related matters                                                           | Spiritual<br>Social relation<br>Sense of place | Mental health<br>(life meaning & value) | <b>Evolutive</b> | Spiritual fulfilment as a result of interacting with nature can positively contribute to mental health by giving meanings and values to people's lives, a sense of purpose, a sense of wholeness and connectedness and a search of hope. Example: acknowledgement of a sense of belonging or knowledge of something greater than oneself via interaction with nature could contribute to positive psychological benefits. Natural places can be extraordinary and associated with identity, beliefs, values, thoughts, remembrance and beyond everyday problems. People can feel a sense of harmony and connectedness to the natural place, consequently loaded with positive attitudes during their visits to nature (Graymore and McBride, 2013; Völker and Kistemann, 2013).<br>People's perception, values and belief system can influence this mechanism | Positive |
|  | <b>12</b> | <b>Cultural practice:</b><br>Nature provides opportunity for playing and exercising, creating and expressing, producing and caring, gathering and consuming | Inspiration                                    | Mental health                           | <b>Creative</b>  | Nature is a source of inspiration for artworks, music, architecture and culture. Engaging in art and creation can improve mental health. Example: inspiration for artworks help relieve stress, add recovery, increase relaxation, gain new perspectives in life, boost confidence and resilient of people (Bieling <i>et al.</i> , 2014; Dou <i>et al.</i> , 2020).<br>Ethnicity, cultural background, age, landscape features can influence this mechanism.                                                                                                                                                                                                                                                                                                                                                                                                 | Positive |

|                                           |           |                                                                                                                                                             |                      |                                           |                       |                                                                                                                                                                                                                                                                                                                                                                                                                                                                                                                                                                                                                                                                                                                                                                              |          |
|-------------------------------------------|-----------|-------------------------------------------------------------------------------------------------------------------------------------------------------------|----------------------|-------------------------------------------|-----------------------|------------------------------------------------------------------------------------------------------------------------------------------------------------------------------------------------------------------------------------------------------------------------------------------------------------------------------------------------------------------------------------------------------------------------------------------------------------------------------------------------------------------------------------------------------------------------------------------------------------------------------------------------------------------------------------------------------------------------------------------------------------------------------|----------|
| <b>IV. CES contribute to Spirituality</b> | <b>13</b> | <b>Cultural practice:</b><br>Nature provides opportunity for playing and exercising, creating and expressing, producing and caring, gathering and consuming | Recreation & tourism | Spirituality - transcendental experiences | <b>Transcendental</b> | <p>Recreational activities in nature setting such as camping, hiking, walking are, at least in part, transcendent experiences which change something from within for many people. Example: Nature-based tourism in the desert in Oman provided opportunities for people to have an 'embodied immersion' – a transformative experience of mythical space through solitude. The mutual observation of the Sun and the experience of waiting for the sun to set can be perceived as a transcendental journey of a transformation of self(Gutberlet, 2019).</p> <p>The perception, values, and beliefs of people can influence this mechanism. The spiritual connectedness is mediated via the aesthetic and physical scenery and the interaction between people and nature.</p> | Positive |
|-------------------------------------------|-----------|-------------------------------------------------------------------------------------------------------------------------------------------------------------|----------------------|-------------------------------------------|-----------------------|------------------------------------------------------------------------------------------------------------------------------------------------------------------------------------------------------------------------------------------------------------------------------------------------------------------------------------------------------------------------------------------------------------------------------------------------------------------------------------------------------------------------------------------------------------------------------------------------------------------------------------------------------------------------------------------------------------------------------------------------------------------------------|----------|

|  |           |                                                                                   |                                                                    |                                        |                  |                                                                                                                                                                                                                                                                                                                                                                                                                                                                                                                                                                                                                                                                                                                                                                                                                                                                                                                                      |          |
|--|-----------|-----------------------------------------------------------------------------------|--------------------------------------------------------------------|----------------------------------------|------------------|--------------------------------------------------------------------------------------------------------------------------------------------------------------------------------------------------------------------------------------------------------------------------------------------------------------------------------------------------------------------------------------------------------------------------------------------------------------------------------------------------------------------------------------------------------------------------------------------------------------------------------------------------------------------------------------------------------------------------------------------------------------------------------------------------------------------------------------------------------------------------------------------------------------------------------------|----------|
|  | <b>14</b> | <b>Form:</b><br>Physical,<br>tangible or<br>measurable<br>aspects of<br>ecosystem | Aesthetic<br>value<br>Cultural<br>heritage<br>Knowledg<br>e system | Spirituality -<br>meanings &<br>values | <b>Intuitive</b> | Many types of ecosystems are richly symbolic environments, which are associated with the physical expression of some spiritual meanings, values and purposes in life, and some of these are directly linked to people's spirituality and religion. Example: In African religions, there are many links between the religious heritage and the Universe's visible and invisible creation. The presence of the Creators can be found in the moon, sun, stars, cloud, rain, wind, lightning, mists, storms, animals, plants, water, and land(Amenga-Etego, 2016). In the mountains in Argentina and Italy, people find meanings from the time they are born to the time they die, as they grow from the Earth and become the Earth again. The spirituality attached to nature brings belief, faith, hope, and empowerment to the people(Steinhäuser, 2020). The perception, values, and beliefs of people can influence this mechanism. | Positive |
|--|-----------|-----------------------------------------------------------------------------------|--------------------------------------------------------------------|----------------------------------------|------------------|--------------------------------------------------------------------------------------------------------------------------------------------------------------------------------------------------------------------------------------------------------------------------------------------------------------------------------------------------------------------------------------------------------------------------------------------------------------------------------------------------------------------------------------------------------------------------------------------------------------------------------------------------------------------------------------------------------------------------------------------------------------------------------------------------------------------------------------------------------------------------------------------------------------------------------------|----------|

|  |           |                                                                                                   |                                                          |                              |                       |                                                                                                                                                                                                                                                                                                                                                                                                                                                                                                                                                                                                                                                                                                                                                              |          |
|--|-----------|---------------------------------------------------------------------------------------------------|----------------------------------------------------------|------------------------------|-----------------------|--------------------------------------------------------------------------------------------------------------------------------------------------------------------------------------------------------------------------------------------------------------------------------------------------------------------------------------------------------------------------------------------------------------------------------------------------------------------------------------------------------------------------------------------------------------------------------------------------------------------------------------------------------------------------------------------------------------------------------------------------------------|----------|
|  | <b>15</b> | <b>Spiritual practice:</b><br>Nature provides opportunity for spiritual/religious related matters | Spiritual value<br>Cultural heritage<br>Knowledge system | Spirituality - religion      | <b>Transcendental</b> | Nature provides sacred spaces for people to carry spiritual and religious practices such as customary rituals, pray to the Creator and worship ancestors. Example: "In Kenya, Individuals or groups conduct 'pilgrimage', which is a journey of spiritual or religious fulfilment to a sacred and salutary place to seek a transcendental encounter with a spiritual entity for acquiring physical, mental, or spiritual healing or benefits(Wangai <i>et al.</i> , 2017). Spiritual benefits offered by nature are not only limited to indigenous communities. Modern Western communities also express varied and deep spiritual connections to ecosystems. Landscape features, the perception, values, and beliefs of people can influence this mechanism. | Positive |
|  | <b>16</b> | <b>Spiritual practice:</b><br>Nature provides opportunity for spiritual/religious related matters | Spiritual value                                          | Spirituality - connectedness | <b>Formative</b>      | People experience ecosystem-inspired feelings related to "entities larger than themselves". Being in harmony with nature is a way to cherish human connections to the Universe. Example, a study about two cases in Canada and the UK indicates that the nature inspires people to reflect on being a tiny speck in the Universe and connect to something more powerful than ourselves. Nonetheless, Interactions with nature can enhance the spiritual relationship of people to their Creator and make them feel they being cared for and close with the Creator(Pike <i>et al.</i> , 2015). Landscape features, the perception, values, and beliefs of people can influence this mechanism.                                                               | Positive |

|                                                       |           |                                                                                                                                                             |                                           |                     |                      |                                                                                                                                                                                                                                                                                                                                                                                                                                                                                                                                                                                                                                                                                                                                                                                                                                                                   |          |
|-------------------------------------------------------|-----------|-------------------------------------------------------------------------------------------------------------------------------------------------------------|-------------------------------------------|---------------------|----------------------|-------------------------------------------------------------------------------------------------------------------------------------------------------------------------------------------------------------------------------------------------------------------------------------------------------------------------------------------------------------------------------------------------------------------------------------------------------------------------------------------------------------------------------------------------------------------------------------------------------------------------------------------------------------------------------------------------------------------------------------------------------------------------------------------------------------------------------------------------------------------|----------|
| <b>V. CES contribute to Learning &amp; capability</b> | <b>17</b> | <b>Cultural practice:</b><br>Nature provides opportunity for playing and exercising, creating and expressing, producing and caring, gathering and consuming | Recreation & tourism                      | Learning & capacity | <b>Evolutionary</b>  | Recreation in nature has positive effects on personal growth and development. Example: Nature can contribute to gradually transforming people to more playful, friendly, elated, and affectionate and develop useful skills in life(Pike <i>et al.</i> , 2015). In a study about home garden in Canada, many interviewees shared that home gardening was gratifying, satisfying and promote their self-esteem, self-appreciation, and courage(Raymond <i>et al.</i> , 2019).                                                                                                                                                                                                                                                                                                                                                                                      |          |
|                                                       | <b>18</b> | <b>Cultural practice:</b><br>Nature provides opportunity for playing and exercising, creating and expressing, producing and caring, gathering and consuming | Recreation & tourism<br>Cultural heritage | Learning & capacity | <b>Communicative</b> | Eco-cultural tourism combined together ecological and cultural aspects of a landscape can create many benefits such as exposing tourists to the indigenous and traditional knowledge, local customs and practices, the history and the local cultural heritage related to the landscape. This type of tourism is also a tool for the local and indigenous communities to keep the traditions and knowledge alive and support the conservation of both ecosystems and cultural heritage. Example: fishing villages in North Carolina promoted heritage and cultural tourism associated with long traditional activities in the areas can help promote local livelihood, educational purposes and awareness rising(Khakzad and Griffith, 2016).<br>Tourists' perception and knowledge, local customs & practice, history and social life can affect this mechanism. | Positive |

|  |           |                                                                                   |                                                                              |                        |                      |                                                                                                                                                                                                                                                                                                                                                                                                                                                                                                                                                             |          |
|--|-----------|-----------------------------------------------------------------------------------|------------------------------------------------------------------------------|------------------------|----------------------|-------------------------------------------------------------------------------------------------------------------------------------------------------------------------------------------------------------------------------------------------------------------------------------------------------------------------------------------------------------------------------------------------------------------------------------------------------------------------------------------------------------------------------------------------------------|----------|
|  | <b>19</b> | <b>Form:</b><br>Physical,<br>tangible or<br>measurable<br>aspects of<br>ecosystem | Aesthetic<br>value                                                           | Learning &<br>capacity | <b>Regenerative</b>  | Exposure to natural systems enhances learning, even of unrelated material. Example: Learning in nature can enhance concentration, cognitive benefits, effectiveness and problem solving and attention restoration. Learning in a nature can be more enjoyable, enhance motivation, and contribute to personal development, consequently increasing overall educational performance(Pike <i>et al.</i> , 2015).                                                                                                                                              | Positive |
|  | <b>20</b> | <b>Form:</b><br>Physical,<br>tangible or<br>measurable<br>aspects of<br>ecosystem | Aesthetics<br>value<br>Cultural<br>heritage<br>value<br>Knowledg<br>e system | Learning &<br>capacity | <b>Communicative</b> | Culturally important landscape features and species, various associated practices and language affect cultural behaviours, the ways people think, the choices they make and their capacity to sustain their livelihood. Example: in the indigenous Sami community in Northern Norway, cultural knowledge and the ecological practices associated with their livelihood are part of the people' capacity. Cultural knowledge and the knowledge transmission strengthen people's sense of self-determination and self-worth(Nystad, Spein and Ingstad, 2014). | Positive |

|  |    |                                                                                                                                          |                                            |                     |                  |                                                                                                                                                                                                                                                                                                                                                                                                                                                                                                                                                                                                                                                                                                                                                                                                                   |  |
|--|----|------------------------------------------------------------------------------------------------------------------------------------------|--------------------------------------------|---------------------|------------------|-------------------------------------------------------------------------------------------------------------------------------------------------------------------------------------------------------------------------------------------------------------------------------------------------------------------------------------------------------------------------------------------------------------------------------------------------------------------------------------------------------------------------------------------------------------------------------------------------------------------------------------------------------------------------------------------------------------------------------------------------------------------------------------------------------------------|--|
|  | 21 | <b>Intellectual practices:</b><br>interactions with nature provide an environment for learning and gaining new information and knowledge | Education value<br>Cultural heritage value | Learning & capacity | <b>Cognitive</b> | <p>Interaction with nature can develop knowledge and understanding of the world. The natural environment is the source of our learning about history, culture, social relationships and human-nature relationships. Nature provides opportunities for scientific development, nature-related education, learning from previous generations. Outdoor education can inspire people to have a more caring relationship with nature. Educating children in the natural setting inspires a sense wonder and attachment for the world around them(Raymond <i>et al.</i>, 2019).</p> <p>Knowledge transmission (place-based, observational, formal, informal, etc.), people's perception and demographic characteristics, childhood experiences with nature, landscape characteristics can influence this mechanism.</p> |  |
|--|----|------------------------------------------------------------------------------------------------------------------------------------------|--------------------------------------------|---------------------|------------------|-------------------------------------------------------------------------------------------------------------------------------------------------------------------------------------------------------------------------------------------------------------------------------------------------------------------------------------------------------------------------------------------------------------------------------------------------------------------------------------------------------------------------------------------------------------------------------------------------------------------------------------------------------------------------------------------------------------------------------------------------------------------------------------------------------------------|--|

|  |    |                                                                                                                                       |                  |                     |                      |                                                                                                                                                                                                                                                                                                                                                                                                                                                                                                                                                                                                                                                                                                                                                                                                                                                                                                                                                                                                                  |          |
|--|----|---------------------------------------------------------------------------------------------------------------------------------------|------------------|---------------------|----------------------|------------------------------------------------------------------------------------------------------------------------------------------------------------------------------------------------------------------------------------------------------------------------------------------------------------------------------------------------------------------------------------------------------------------------------------------------------------------------------------------------------------------------------------------------------------------------------------------------------------------------------------------------------------------------------------------------------------------------------------------------------------------------------------------------------------------------------------------------------------------------------------------------------------------------------------------------------------------------------------------------------------------|----------|
|  | 22 | <b>Intellectual practices:</b> interactions with nature provide an environment for learning and gaining new information and knowledge | Knowledge system | Learning & capacity | <b>Communicative</b> | Local and traditional ecological knowledge plays important role in the development at both personal and community level. Practices based on local knowledge are passed down from generation to generation. For example, In West Hawaii, traditional knowledge includes language and/or culture encoded knowledge such as rain and other meteorological phenomena or plant/animal behaviour and characteristics; species or natural processes that are associated with the cycles of another plant/animal species, landscape-specific practices. There are possibilities for co-construction of knowledge that incorporate local nature-encoded knowledge capital and scientific expertise for appropriate management interventions for the ecosystems (Leong <i>et al.</i> , 2019). Knowledge transmission (place-based, observational, formal, informal, etc.), people's perception and demographic characteristics, childhood experiences with nature, landscape characteristics can influence this mechanism. | Positive |
|--|----|---------------------------------------------------------------------------------------------------------------------------------------|------------------|---------------------|----------------------|------------------------------------------------------------------------------------------------------------------------------------------------------------------------------------------------------------------------------------------------------------------------------------------------------------------------------------------------------------------------------------------------------------------------------------------------------------------------------------------------------------------------------------------------------------------------------------------------------------------------------------------------------------------------------------------------------------------------------------------------------------------------------------------------------------------------------------------------------------------------------------------------------------------------------------------------------------------------------------------------------------------|----------|



|  |           |                                                                                                                                                             |                                                  |                     |                      |                                                                                                                                                                                                                                                                                                                                                                                                                                                                                                                                                                                                                                                                                                                                                          |          |
|--|-----------|-------------------------------------------------------------------------------------------------------------------------------------------------------------|--------------------------------------------------|---------------------|----------------------|----------------------------------------------------------------------------------------------------------------------------------------------------------------------------------------------------------------------------------------------------------------------------------------------------------------------------------------------------------------------------------------------------------------------------------------------------------------------------------------------------------------------------------------------------------------------------------------------------------------------------------------------------------------------------------------------------------------------------------------------------------|----------|
|  | <b>23</b> | <b>Form:</b><br>Physical, tangible or measurable aspects of ecosystem                                                                                       | Spiritual value<br>Sense of place<br>Inspiration | Learning & capacity | <b>Retrospective</b> | The sense of 'untouched' and 'natural' that the place has inspires the imagination, a sense of perspective, reflection and judgement. The childhood memories with the places, previous land-uses, the changes in the ecosystems through time, the origins of the landscapes, local identity, people in the past, etc. shape the way people think, their perspective and capability in lives. Example: A study on coastal landscape indicates that a particular landscape can inspire a sense of reflection and encourage people to put things into perspective. For some respondents, this reflection was inspired by the physical form of cliffs which was linked with the eternity of nature compared with the shortness of human lives(Willis, 2015). |          |
|  | <b>24</b> | <b>Cultural practice:</b><br>Nature provides opportunity for playing and exercising, creating and expressing, producing and caring, gathering and consuming | Social relations<br>Recreation & tourism         | Learning & capacity | <b>Cohesive</b>      | Social interactions and activities in natural setting form an important part in social structures, principles of reciprocity, and important for personal development. Example: Resources generated from social relations in nature are categorised into four different kinds of social capital: 'political and financial skills social capital, prestige and education-associated social capital, personal skills social capital, and personal support social capital'. These social capitals are important in building resilience at both personal and community level(Kamiyama <i>et al.</i> , 2016).                                                                                                                                                  | Positive |

|                                                                       |           |                                                                                                                                                             |                                                                                        |                                          |                      |                                                                                                                                                                                                                                                                                                                                                                                                                                               |          |
|-----------------------------------------------------------------------|-----------|-------------------------------------------------------------------------------------------------------------------------------------------------------------|----------------------------------------------------------------------------------------|------------------------------------------|----------------------|-----------------------------------------------------------------------------------------------------------------------------------------------------------------------------------------------------------------------------------------------------------------------------------------------------------------------------------------------------------------------------------------------------------------------------------------------|----------|
| <b>VI. CES contribute to Certainty, sense of control and security</b> | <b>25</b> | <b>Form:</b><br>Physical, tangible or measurable aspects of ecosystem                                                                                       | Aesthetic value<br>Sense of place                                                      | Certainty, sense of control and security | <b>Formative</b>     | The shape, beauty, suitability of the natural places can make people feel safe. Example: In a study about woodland in England, interviewees mentioned the physical characteristics of the woodland canopy and the ways they create a sense of safety, security, and protection(O'Brien, Morris and Stewart, 2014).<br>Cultural and demographic background, landscape features and people's perception and values can influence this mechanism | Positive |
|                                                                       | <b>26</b> | <b>Cultural practice:</b><br>Nature provides opportunity for playing and exercising, creating and expressing, producing and caring, gathering and consuming | Sense of place<br>Recreation & tourism<br>Aesthetic                                    | Certainty, sense of control and security | <b>Retrospective</b> | The close relationship people have with nature consequently develops feeling of security and belonging associated with the place.<br>Example: a study about Genheyuan National Wetland Park found that 94.7% of the respondents feel safest in the wetlands where they are in the familiar places in which they have many memorable experiences(Dou <i>et al.</i> , 2020).                                                                    | Positive |
| <b>VII. CES contribute to Inspiration, Fulfilment of imagination</b>  | <b>27</b> | <b>Cultural practice:</b><br>Nature provides opportunity for playing and exercising, creating and expressing, producing and caring,                         | Recreation & tourism<br>Educational value<br>Sense of place<br>Cultural heritage value | Inspiration & Fulfilment of imagination  | <b>Evolutive</b>     | Recreational activities in natural areas are positively associated with pro-environmental behaviours and stewardship, support for environmental protection, and fundraising.<br>Our interaction with nature can inspire people to care more about nature, increase environmental literacy and environmental awareness(Hunter, 2011).<br>Education level and demographic background of people can influence this mechanism.                    | Positive |

|  |    |                                                                                                                                                             |                                                                    |                                         |                 |                                                                                                                                                                                                                                                                                                                                                                                                                                                                                                                                                                              |          |
|--|----|-------------------------------------------------------------------------------------------------------------------------------------------------------------|--------------------------------------------------------------------|-----------------------------------------|-----------------|------------------------------------------------------------------------------------------------------------------------------------------------------------------------------------------------------------------------------------------------------------------------------------------------------------------------------------------------------------------------------------------------------------------------------------------------------------------------------------------------------------------------------------------------------------------------------|----------|
|  |    | gathering and consuming                                                                                                                                     |                                                                    |                                         |                 |                                                                                                                                                                                                                                                                                                                                                                                                                                                                                                                                                                              |          |
|  | 28 | <b>Cultural practice:</b><br>Nature provides opportunity for playing and exercising, creating and expressing, producing and caring, gathering and consuming | Recreation & tourism<br>Aesthetic value<br>Cultural heritage value | Inspiration & Fulfilment of imagination | <b>Creative</b> | Interaction with nature can inspire people and help people to live a life with positive experiences and creation. Example: In a study about lowland and grassland in Southern England, respondents stated that nature offers them original and new experiences that inspire aesthetic appreciation, artistic expression, creativity, and freedom. Nature inspires them to write, draw, paint, photograph, be active and positive, protect, conserve, discover, explore, walk, exercise, and think about things(King <i>et al.</i> , 2017).                                   | Positive |
|  | 29 | <b>Cultural practice:</b><br>Nature provides opportunity for playing and exercising, creating and expressing, producing and caring, gathering and consuming | Social relations<br>Recreation & tourism                           | Inspiration & Fulfilment of imagination | <b>Cohesive</b> | Social interactions and activities in natural setting can strengthen ties, reinforce fundamental values and inspire respect, culture, and responsibility, solidarity and caring for the communities and the environment. Example: In Balcarce County, agricultural landscape inspires local traditional cuisines, cultural practices and social gatherings, social cohesion, culture values or, the “authentic rural lifestyles”(Auer, Maceira and Nahuelhual, 2017).<br>People's perception, belief and values and demographic characteristics can influence this mechanism | Positive |

|                                                        |           |                                                                       |                         |                                           |                  |                                                                                                                                                                                                                                                                                                                                                                                                                                                                                                                                                                                                                                                                                                                                                                                                       |          |
|--------------------------------------------------------|-----------|-----------------------------------------------------------------------|-------------------------|-------------------------------------------|------------------|-------------------------------------------------------------------------------------------------------------------------------------------------------------------------------------------------------------------------------------------------------------------------------------------------------------------------------------------------------------------------------------------------------------------------------------------------------------------------------------------------------------------------------------------------------------------------------------------------------------------------------------------------------------------------------------------------------------------------------------------------------------------------------------------------------|----------|
| <b>VIII. CES contribute to Identity &amp; autonomy</b> | <b>30</b> | <b>Form:</b><br>Physical, tangible or measurable aspects of ecosystem | Spiritual value         | Identity & autonomy (individual identity) | <b>Intuitive</b> | Plants and landscapes can metamorphose to spirit person or ancestral character. Natural environment in the place people born and grow up reflect in their individual and collective identity, cultural and historical significance. The identity-landscape connection exists in many indigenous communities, and this connection manifests significantly via people's interaction with the landscape. Example: “Ecocentric identity”—is that identity encompasses human, animal, and material. Many indigenous people such as Inuit have this form of identity(Russell <i>et al.</i> , 2013).<br>The connection between nature and identity can also be mediated by particular species.                                                                                                               | Positive |
|                                                        | <b>31</b> | <b>Form:</b><br>Physical, tangible or measurable aspects of ecosystem | Cultural heritage value | Identity & autonomy (collective identity) | <b>Intuitive</b> | Ecosystems within communal lands are associated with cultural value, forming an important part of local culture and identity. Specific species can have totemic value, and encode certain customary laws or codes of conduct. Example: In central Australian Aboriginal communities, the history of a family and certain social cohorts are associated with how species are named and classified. Long-standing institutional arrangements, cultural and social practices and norms revolving around communal lands significantly contribute to local cultural identity. Some ecosystem is a symbol of the community and reflect a way of life and identity of the people(Walsh, Dobson and Douglas, 2013).<br>Cultural identity was strongly attached to place and time, and relating to biocultural | Positive |

|  |           |                                                                                                                                                             |                                   |                     |                      |                                                                                                                                                                                                                                                                                                                                                                                                                                                                                                                                                                                                                                                                                                                         |          |
|--|-----------|-------------------------------------------------------------------------------------------------------------------------------------------------------------|-----------------------------------|---------------------|----------------------|-------------------------------------------------------------------------------------------------------------------------------------------------------------------------------------------------------------------------------------------------------------------------------------------------------------------------------------------------------------------------------------------------------------------------------------------------------------------------------------------------------------------------------------------------------------------------------------------------------------------------------------------------------------------------------------------------------------------------|----------|
|  |           |                                                                                                                                                             |                                   |                     |                      | diversity, effects of nature on lifestyle and built heritage                                                                                                                                                                                                                                                                                                                                                                                                                                                                                                                                                                                                                                                            |          |
|  | <b>32</b> | <b>Form:</b><br>Physical, tangible or measurable aspects of ecosystem                                                                                       | Sense of place<br>Aesthetic value | Identity & autonomy | <b>Retrospective</b> | <p>People form emotional and cognitive bonds with the natural landscapes. Ecosystems are part of their personal and collective memory, their childhood and their life-story.</p> <p>Example: A study in Swedish mountain indicates that the strength of the attachment (emotional component of place identity) between people and the natural places is positively linked with the level of well-being they perceived when they are at these places. Similarly, the level of thinking, remembrance, and mental travel (cognitive component of place identity) people direct to the natural places is also positively associated with the level of well-being people perceive at the places(Knez and Eliasson, 2017)</p> | Positive |
|  | <b>33</b> | <b>Cultural practice:</b><br>Nature provides opportunity for playing and exercising, creating and expressing, producing and caring, gathering and consuming | Recreation & tourism              | Identity & autonomy | <b>Retrospective</b> | <p>Recreational experiences in natural setting form part of people's memories and their identity. Individual identities are intricately intertwined with the surroundings and the interactions and experiences in childhood.</p> <p>Example: recreational activities in agricultural landscapes in Balcarce County give people satisfaction and caress for the heart, forming important part of their childhood memories(Auer, Maceira and Nahuelhual, 2017).</p> <p>Personal relational value, place attachment, childhood experience with nature, exposure to nature and environmental attributes can influence this mechanism</p>                                                                                    | Positive |

|  |           |                                                                                                                                                             |                  |                                           |                  |                                                                                                                                                                                                                                                                                                                                                                                                                                                                                                                                                                                                                                                                                                                                                                                  |  |
|--|-----------|-------------------------------------------------------------------------------------------------------------------------------------------------------------|------------------|-------------------------------------------|------------------|----------------------------------------------------------------------------------------------------------------------------------------------------------------------------------------------------------------------------------------------------------------------------------------------------------------------------------------------------------------------------------------------------------------------------------------------------------------------------------------------------------------------------------------------------------------------------------------------------------------------------------------------------------------------------------------------------------------------------------------------------------------------------------|--|
|  | <b>34</b> | <b>Form:</b><br>Physical, tangible or measurable aspects of ecosystem                                                                                       | Aesthetic value  | Identity & autonomy (individual autonomy) | <b>Formative</b> | Ecosystems offer spaces for individuals to be enabled to express their personal distinctiveness and identity without feeling constrained by external factors such as the norms and values imposed by society. Naturalness enable the mechanism of achieving a personal sense of freedom and escapism from the social boundaries created by extrinsic factors of society. The sense of freedom and autonomy inspired by wild nature can allow individuals to strengthen their own intrinsic values and beliefs and to feel they can be free and make their own choices in lives(Bentley Brymer <i>et al.</i> , 2020). Personal relational value, place attachment, childhood experience with nature, exposure to nature and environmental attributes can influence this mechanism |  |
|  | <b>35</b> | <b>Cultural practice:</b><br>Nature provides opportunity for playing and exercising, creating and expressing, producing and caring, gathering and consuming | Knowledge system | Identity & autonomy (collective autonomy) | <b>Cognitive</b> | Landscapes often associated with people's livelihoods and their autonomy level. These landscapes are linked with the local ecological knowledge. Example: in the timber towns in the Inland Northwest, livelihood and work history, with the knowledge system can shape identities for both individual and collective scale. These are important predictors of the level of community autonomy(Russell and Harris, 2001).                                                                                                                                                                                                                                                                                                                                                        |  |

|                                                          |           |                                                                                                                                                             |                                                              |                                                 |                  |                                                                                                                                                                                                                                                                                                                                                                                                                                                                                                                                                                            |          |
|----------------------------------------------------------|-----------|-------------------------------------------------------------------------------------------------------------------------------------------------------------|--------------------------------------------------------------|-------------------------------------------------|------------------|----------------------------------------------------------------------------------------------------------------------------------------------------------------------------------------------------------------------------------------------------------------------------------------------------------------------------------------------------------------------------------------------------------------------------------------------------------------------------------------------------------------------------------------------------------------------------|----------|
| <b>IX. CES contribute to Connectedness and belonging</b> | <b>36</b> | <b>Form:</b><br>Physical, tangible or measurable aspects of ecosystem                                                                                       | Sense of place<br>Social relation<br>Cultural heritage value | Connectedness & belonging<br>(Place attachment) | <b>Cohesive</b>  | Nature can create a sense of belonging by representing the symbol connections between individuals and their ancestors or cultures. Place belonging and attachment can reinforce social capital, creating collective benefits, such as more collaborative collective actions. Example: A place of attachment can inspire connections to past events and people. Recurring social events can be hosted in the places where people have a great sense of attachment and contribute to enhancing their social relationships and community cohesion(King <i>et al.</i> , 2017). | Positive |
|                                                          | <b>37</b> | <b>Cultural practice:</b><br>Nature provides opportunity for playing and exercising, creating and expressing, producing and caring, gathering and consuming | Sense of place<br>Recreation & tourism<br>Aesthetic          | Connectedness & belonging<br>(Place attachment) | <b>Intuitive</b> | Interaction with nature can create place dependence. People feel a sense of belonging when they are in a familiar places. The value of a natural place is associated with its capacity to fulfill the needs or behavioural purposes of an individual or group. Example, ecosystems can closely be linked with people's livelihood and way of life and, create a sense of belonging to people(Adams and Neil Adger, 2013).                                                                                                                                                  | Positive |

|  |           |                                                                                                                                                             |                                          |                                                   |                                                                                                                                                                                                                                                                                                                                                                                                                                                                                                                                                                                                                                                                                                                                                       |          |
|--|-----------|-------------------------------------------------------------------------------------------------------------------------------------------------------------|------------------------------------------|---------------------------------------------------|-------------------------------------------------------------------------------------------------------------------------------------------------------------------------------------------------------------------------------------------------------------------------------------------------------------------------------------------------------------------------------------------------------------------------------------------------------------------------------------------------------------------------------------------------------------------------------------------------------------------------------------------------------------------------------------------------------------------------------------------------------|----------|
|  | <b>38</b> | <b>Cultural practice:</b><br>Nature provides opportunity for playing and exercising, creating and expressing, producing and caring, gathering and consuming | Social relations<br>Recreation & tourism | Connectedness & belonging (personal relationship) | <b>Cohesive</b><br><br>People can develop the bonds with family and friends through interaction with nature. Particular landscape can strengthen the bonds with family history, linked with family memories or symbolise a continuation of life over generations. Example: In a study about Florida National Scenic Trail hikers, on a personal level, "good social relation", "family", "friends", "neighbours" and "kinship" are mentioned by the majority respondents when talking about the social benefits they obtain from these hiking activities(Kil <i>et al.</i> , 2012).<br>Landscape features, exposure to nature, time spent in nature, demographic factors, the perception, values, and beliefs of people can influence this mechanism. | Positive |
|--|-----------|-------------------------------------------------------------------------------------------------------------------------------------------------------------|------------------------------------------|---------------------------------------------------|-------------------------------------------------------------------------------------------------------------------------------------------------------------------------------------------------------------------------------------------------------------------------------------------------------------------------------------------------------------------------------------------------------------------------------------------------------------------------------------------------------------------------------------------------------------------------------------------------------------------------------------------------------------------------------------------------------------------------------------------------------|----------|



|  |           |                                                                                                                                                             |                                     |                                                                           |                  |                                                                                                                                                                                                                                                                                                                                                                                                                                                                                                                                                                                                                                                                                                                                                                                                                             |          |
|--|-----------|-------------------------------------------------------------------------------------------------------------------------------------------------------------|-------------------------------------|---------------------------------------------------------------------------|------------------|-----------------------------------------------------------------------------------------------------------------------------------------------------------------------------------------------------------------------------------------------------------------------------------------------------------------------------------------------------------------------------------------------------------------------------------------------------------------------------------------------------------------------------------------------------------------------------------------------------------------------------------------------------------------------------------------------------------------------------------------------------------------------------------------------------------------------------|----------|
|  | <b>39</b> | <b>Cultural practice:</b><br>Nature provides opportunity for playing and exercising, creating and expressing, producing and caring, gathering and consuming | Inspiration<br>Social relation      | Connectedness & belonging (social cohesion via environmental stewardship) | <b>Cohesive</b>  | Interaction with nature can foster social cohesion via environmental awareness, socially beneficial behaviours and stewardship. As a form of social participation, stewardship enable interactions among diverse groups, creates favourable environment for developing relationships and expanding social networks. Example: Studies have consistently found that the social bonding formed in nature can create networks that emerge beyond the physical boundary of the sites, enhancing stewardship and reinforce the existing relationship at both personal and collective levels (Parlee, Berkes and Gwich'In, 2005; McMillen <i>et al.</i> , 2016).<br>Landscape features, exposure to nature, time spent in nature, demographic factors, the perception, values, and beliefs of people can influence this mechanism. | Positive |
|  | <b>40</b> | <b>Intellectual practices:</b><br>interactions with nature provide an environment for learning and gaining new information and knowledge                    | Education value<br>Social relations | Connectedness (social cohesion via education)                             | <b>Cognitive</b> | Outdoor education can bring people closer to each other. Children who have many experiences in nature and learn how to protect it tend to become more active citizens when they grow up; interact more in their community and engage better in a democratic society. Family bonds can be improved through teaching children to interact with nature. Knowledge transferred across generations is critical to conserve cultural knowledge of local resources and the continuation of cultural practices (Pike <i>et al.</i> , 2015).<br>Landscape features, exposure to nature, time spent in nature, demographic factors, the                                                                                                                                                                                               | Positive |

|                                                 |           |                                                                                                                                                             |                         |                                   |                      |                                                                                                                                                                                                                                                                                                                                                                                                                                                                                                                                                                                                                                              |          |
|-------------------------------------------------|-----------|-------------------------------------------------------------------------------------------------------------------------------------------------------------|-------------------------|-----------------------------------|----------------------|----------------------------------------------------------------------------------------------------------------------------------------------------------------------------------------------------------------------------------------------------------------------------------------------------------------------------------------------------------------------------------------------------------------------------------------------------------------------------------------------------------------------------------------------------------------------------------------------------------------------------------------------|----------|
|                                                 |           |                                                                                                                                                             |                         |                                   |                      | perception, values, and beliefs of people can influence this mechanism.                                                                                                                                                                                                                                                                                                                                                                                                                                                                                                                                                                      |          |
|                                                 | <b>41</b> | <b>Cultural practice:</b><br>Nature provides opportunity for playing and exercising, creating and expressing, producing and caring, gathering and consuming | Social relations        | Connectedness (via communication) | <b>Communicative</b> | Ecosystems offer opportunity for socializing, expanding networks, and increasing social integration. People perceived natural landscape as spaces for socialisation with neighbours; where they can strengthen the relations of solidarity and mutual support. Example: Berry picking activities in Northern Canada are the events where people get together and socialise. Participants mentioned the benefits of working together and socialise in the land with their neighbours. They also talked about the benefits of sharing either information, materials or experiences during these occasions (Parlee, Berkes and Gwich'in, 2005). | Positive |
| <b>X. CES contribute to cultural fulfilment</b> | <b>42</b> | Cultural practice:<br>Nature provides opportunity for playing and                                                                                           | Cultural heritage value | Cultural fulfilment               | <b>Satisfactive</b>  | Particular landscape can be associated with people's livelihood and way of life, and represent the local history and culture. Engaging in cultural events in such landscapes can fulfil people's cultural needs and instil                                                                                                                                                                                                                                                                                                                                                                                                                   | Positive |

|                                                   |           |                                                                                                                                                             |                                                                            |                                                   |                     |                                                                                                                                                                                                                                                                                                                                                                                                                                                                                                                                                                                                                                                                                                                                                                                                                                                                                                               |          |
|---------------------------------------------------|-----------|-------------------------------------------------------------------------------------------------------------------------------------------------------------|----------------------------------------------------------------------------|---------------------------------------------------|---------------------|---------------------------------------------------------------------------------------------------------------------------------------------------------------------------------------------------------------------------------------------------------------------------------------------------------------------------------------------------------------------------------------------------------------------------------------------------------------------------------------------------------------------------------------------------------------------------------------------------------------------------------------------------------------------------------------------------------------------------------------------------------------------------------------------------------------------------------------------------------------------------------------------------------------|----------|
|                                                   |           | exercising, creating and expressing, producing and caring, gathering and consuming                                                                          |                                                                            |                                                   |                     | feelings of satisfaction(Adams and Neil Adger, 2013).                                                                                                                                                                                                                                                                                                                                                                                                                                                                                                                                                                                                                                                                                                                                                                                                                                                         |          |
| <b>XI. CES contribute to subjective wellbeing</b> | <b>43</b> | <b>Cultural practice:</b><br>Nature provides opportunity for playing and exercising, creating and expressing, producing and caring, gathering and consuming | Recreation & tourism<br>Aesthetic value<br>Social relations<br>Inspiration | Subjective well-being:<br>experiential well-being | <b>Satisfactive</b> | Positive and Negative hedonic or experiential wellbeing is defined as the emotions of pleasure (e.g. happiness) and pain (e.g. anxiety) people experience. Interaction with and socialising in nature and the beauty of nature can fulfil leisure needs and imagination associated with positive feelings. People feel enlightened, novelty, compatibility, fascination, timelessness, cultural satisfaction, connectivity to the past and union when they are in nature, which increase their subjective experiential well-being. Research constantly find that the level of exposure to natural settings is positively associated with level of subjective satisfaction and happiness(Lindberg, Swearingen and White, 2020).<br>Perceived site level biodiversity per se, and site satisfaction and feeling connected to nature, nature dose and self-estimated mental health can influence this mechanism. | Positive |

|  |           |                                                                                                                                                             |                                                                            |                                                 |                  |                                                                                                                                                                                                                                                                                                                                                                                                                                                                                                                                                                                                                                        |          |
|--|-----------|-------------------------------------------------------------------------------------------------------------------------------------------------------------|----------------------------------------------------------------------------|-------------------------------------------------|------------------|----------------------------------------------------------------------------------------------------------------------------------------------------------------------------------------------------------------------------------------------------------------------------------------------------------------------------------------------------------------------------------------------------------------------------------------------------------------------------------------------------------------------------------------------------------------------------------------------------------------------------------------|----------|
|  | <b>44</b> | <b>Cultural practice:</b><br>Nature provides opportunity for playing and exercising, creating and expressing, producing and caring, gathering and consuming | Recreation & tourism<br>Aesthetic value<br>Social relations<br>Inspiration | Subjective well-being:<br>eudaimonic well-being | <b>Formative</b> | Eudaimonic wellbeing is associated with how meaningful/worthwhile individuals think their behaviours/activities are. Interaction with and socialising in nature can offer significant benefits to their personal development and social relationship and give people meanings and purposes in life. All of these experiences make people feel their lives are meaningful and worthwhile at the particular moment and increase their eudaimonic well-being. Perceived site level biodiversity per se, and site satisfaction and feeling connected to nature, nature dose and self-estimated mental health can influence this mechanism. | Positive |
|  | <b>45</b> | <b>Cultural practice:</b><br>Nature provides opportunity for playing and exercising, creating and expressing, producing and caring, gathering and consuming | Recreation & tourism<br>Aesthetic value<br>Social relations<br>Inspiration | Subjective well-being:<br>evaluative well-being | <b>Formative</b> | Evaluative wellbeing is associated with how well individuals think their life is going overall. Interaction with nature can create more positive feeling, promote mental and physical health and increase the level of life satisfaction overall(Lindberg, Swearingen and White, 2020).                                                                                                                                                                                                                                                                                                                                                | Positive |

**TABLE S13: CULTURAL ECOSYSTEM DISSERVICES**

| <b>CULTURAL ECOSYSTEM DISSERVICES</b> |                                                                    |                                        |                                   |                                  |                       |                                                                                                                                                                                                                                                                                                                                                                                                                                                                                                                                               |                            |
|---------------------------------------|--------------------------------------------------------------------|----------------------------------------|-----------------------------------|----------------------------------|-----------------------|-----------------------------------------------------------------------------------------------------------------------------------------------------------------------------------------------------------------------------------------------------------------------------------------------------------------------------------------------------------------------------------------------------------------------------------------------------------------------------------------------------------------------------------------------|----------------------------|
| <b>No</b>                             | <b>Interaction with ecosystem through</b>                          | <b>State of provision of ecosystem</b> | <b>Cultural ecosystem service</b> | <b>Constituent of well-being</b> | <b>Mechanism type</b> | <b>Mechanism explained in detail</b>                                                                                                                                                                                                                                                                                                                                                                                                                                                                                                          | <b>Direction of impact</b> |
| 1                                     | <b>Form:</b> Physical, tangible or measurable aspects of ecosystem | Static                                 | Aesthetic value                   | Physical health                  | <b>Irritative</b>     | <p>People were most concern about the health problems associated with their local environment(Shackleton <i>et al.</i>, 2016). For example, people are concerned about the local environment that impacts their health, such as unwanted pests, allergies from pollens, vector-spread diseases, noises from wildlife, scary natural landscapes, etc(Bolund and Hunhammar, 1999; Larson <i>et al.</i>, 2019).</p> <p>People's perception of ES, their socio-cultural value, knowledge and use of ecosystems (can influence this mechanism.</p> | Negative                   |
| 2                                     | <b>Form:</b> Physical, tangible or measurable aspects of ecosystem | Static                                 | Aesthetic value                   | Mental health                    | <b>Irritative</b>     | <p>Ecosystem disservices cause negative feelings (anxiety and discomfort) and affect mental health of people. Example: Noise generated from wildlife, movements and the presence of some pests causing a disordered impression, plant litter or animal wastes causing disgust(Lyytimäki <i>et al.</i>, 2008), jumping insects(Hussain <i>et al.</i>, 2019)</p>                                                                                                                                                                                | Negative                   |

|   |                                                                    |        |                 |                                          |                     |                                                                                                                                                                                                                                                                                                                                                                                                                   |          |
|---|--------------------------------------------------------------------|--------|-----------------|------------------------------------------|---------------------|-------------------------------------------------------------------------------------------------------------------------------------------------------------------------------------------------------------------------------------------------------------------------------------------------------------------------------------------------------------------------------------------------------------------|----------|
| 3 | <b>Form:</b> Physical, tangible or measurable aspects of ecosystem | Static | Aesthetic value | Mental health                            | <b>Apprehensive</b> | Natural resource loss can be associated with fear and create some dramatic impacts on mental health. For example, biodiversity loss was revealed to be the contributor to generalised mental suffering and post-traumatic stress(Russell <i>et al.</i> , 2013).                                                                                                                                                   | Negative |
| 4 | <b>Form:</b> Physical, tangible or measurable aspects of ecosystem | Static | Aesthetic value | Certainty, sense of control and security | <b>Apprehensive</b> | The common concern when people are in natural setting is the fear of safety. Crime rate is high in the natural areas where there is higher tree cover. Example: The high tree cover areas or wild areas offer favourable for people to do 'inappropriate things' such as drinking or drugs. The high crime rate in these areas may create a sense of fear for the surrounding people(Sonti <i>et al.</i> , 2020). | Negative |

|   |                                                                                                                                                          |        |                      |                                          |                     |                                                                                                                                                                                                                                                                                                                                                                                                                                                                                                                                                                                                                                                                                                                                                                               |          |
|---|----------------------------------------------------------------------------------------------------------------------------------------------------------|--------|----------------------|------------------------------------------|---------------------|-------------------------------------------------------------------------------------------------------------------------------------------------------------------------------------------------------------------------------------------------------------------------------------------------------------------------------------------------------------------------------------------------------------------------------------------------------------------------------------------------------------------------------------------------------------------------------------------------------------------------------------------------------------------------------------------------------------------------------------------------------------------------------|----------|
| 5 | <b>Form:</b> Physical, tangible or measurable aspects of ecosystem                                                                                       | Static | Aesthetic value      | Certainty, sense of control and security | <b>Apprehensive</b> | The common concern people have is the fear of safety which is directly associated with perceiving natural elements. Obsessive fear can be created when people encounter natural features via visual (or sometimes auditory) interactions, such as scary animals, dangerous predators, animal blood, dark high tree-covered areas, etc.(Russell <i>et al.</i> , 2013; Hussain <i>et al.</i> , 2019; Sonti <i>et al.</i> , 2020). Many people have a limited frame of reference for recognising and construing such unfamiliar sensory experiences, and may develop a sense of overwhelming “cognitive chaos” and alienation towards nature(Russell <i>et al.</i> , 2013)<br>People's demographic background and childhood interaction with nature can influence this mechanism | Negative |
| 6 | <b>Cultural practice:</b> Nature provides opportunity for playing and exercising, creating and expressing, producing and caring, gathering and consuming | Static | Recreation & tourism | Certainty, sense of control and security | <b>Irritative</b>   | Human-wildlife conflicts affect the safety of millions of people globally. Some behaviours of species can be perceived to be dangerous to people and trigger human–avian conflict. These behaviours include aggression towards humans, threatening, jeopardising infrastructures or causing mess, or destroying behaviours. Example: Some indigenous people in Sahelian wetlands develop a sense of fear toward the wildlife due to the crop destruction associated with wildlife                                                                                                                                                                                                                                                                                             | Negative |

|   |                                                                    |        |                 |                       |                    |                                                                                                                                                                                                                                                                                                                                                                                                                                             |          |
|---|--------------------------------------------------------------------|--------|-----------------|-----------------------|--------------------|---------------------------------------------------------------------------------------------------------------------------------------------------------------------------------------------------------------------------------------------------------------------------------------------------------------------------------------------------------------------------------------------------------------------------------------------|----------|
|   |                                                                    |        |                 |                       |                    | in the areas(Ezealor and Giles, 1997).                                                                                                                                                                                                                                                                                                                                                                                                      |          |
| 7 | <b>Form:</b> Physical, tangible or measurable aspects of ecosystem | Static | Aesthetic value | Subjective well-being | <b>Destructive</b> | Many sites are neglected, abused, damaged, or unpleasant and disturbingly noisy, affecting subjective well-being of people. Example: in a studies about green roofs in Chicago and Toronto, many respondents indicated that the prairie 'messy, unkempt, and too wild looking. It seems not very well maintained, not very well landscaped'(Loder, 2014). Landscape features, land cover forms and perception can influence this mechanism. | Negative |



|   |                                                                    |        |                 |                     |                    |                                                                                                                                                                                                                                                                                                                                                                                                                                                                                                                                                                                                                                  |          |
|---|--------------------------------------------------------------------|--------|-----------------|---------------------|--------------------|----------------------------------------------------------------------------------------------------------------------------------------------------------------------------------------------------------------------------------------------------------------------------------------------------------------------------------------------------------------------------------------------------------------------------------------------------------------------------------------------------------------------------------------------------------------------------------------------------------------------------------|----------|
| 8 | <b>Form:</b> Physical, tangible or measurable aspects of ecosystem | Static | Aesthetic value | Economic well-being | <b>Destructive</b> | Ecosystem disservices can increase the direct cost for repairs and maintenance, control or remove unwanted species. Financial loss to physical structures can be caused by, e.g., microbial community causing decomposition of wood for construction, tree roots and branches breaking up manmade infrastructure or animals destroying the construction. Harmful animals or plants can harm garden plants or pets (herbivorous species harm crops, pests, fungi). Many maintenance problems of buildings are associated with tall trees. Shading vegetation can also provide cover for burglars(Lyytimäki <i>et al.</i> , 2008). | Negative |
|---|--------------------------------------------------------------------|--------|-----------------|---------------------|--------------------|----------------------------------------------------------------------------------------------------------------------------------------------------------------------------------------------------------------------------------------------------------------------------------------------------------------------------------------------------------------------------------------------------------------------------------------------------------------------------------------------------------------------------------------------------------------------------------------------------------------------------------|----------|

**TABLE S14: NEGATIVE CONTRIBUTION OF CES DUE TO EXTERNAL DRIVERS**

In describing these pathways, the authors have chosen to avoid repetitions by focusing on the pathways where the impacts on well-being are not simply the reduction of the services (opposite effects of the counterpart positive pathways) but an additional reaction to the loss of services or trade-offs or underlying factors manifest these circumstances.

| No | Interaction with ecosystem through                                                                                                                | State/drivers of provision of ecosystem                                       | Cultural ecosystem service | Constituent of well-being | Mechanism    | Mechanism explained in detail                                                                                                                                                                                                                                                                                                                                                                                                                                                                                                                                                                          | Direction of impact |
|----|---------------------------------------------------------------------------------------------------------------------------------------------------|-------------------------------------------------------------------------------|----------------------------|---------------------------|--------------|--------------------------------------------------------------------------------------------------------------------------------------------------------------------------------------------------------------------------------------------------------------------------------------------------------------------------------------------------------------------------------------------------------------------------------------------------------------------------------------------------------------------------------------------------------------------------------------------------------|---------------------|
| 1  | Cultural practice: Nature provides opportunity for playing and exercising, creating and expressing, producing and caring, gathering and consuming | Degrade<br>Drivers: environmental pollution and degradation<br>Climate change | Recreation & tourism       | Economic well-being       | Remunerative | Environmental degradation and climate change greatly impact tourism industry, especially those rely heavily on nature such as winter sport, water-related activities, etc. This significantly reduces the tourism revenue, damaged local reputation, decreased incomes and employment loss. Indirect costs associated with environmental degradation includes human health, safety costs, restoration costs and reduced investments in the region(Schultz <i>et al.</i> , 2016; Schirpke <i>et al.</i> , 2018). Environmental quality, weather and the livelihood of people can affect this mechanism. | Negative            |

|   |                                                                                                                                                   |                                                             |                      |                     |              |                                                                                                                                                                                                                                                                                                                                                                                                                                                                                                                                                                                                |          |
|---|---------------------------------------------------------------------------------------------------------------------------------------------------|-------------------------------------------------------------|----------------------|---------------------|--------------|------------------------------------------------------------------------------------------------------------------------------------------------------------------------------------------------------------------------------------------------------------------------------------------------------------------------------------------------------------------------------------------------------------------------------------------------------------------------------------------------------------------------------------------------------------------------------------------------|----------|
| 2 | Form: Physical, tangible or measurable aspects of ecosystem                                                                                       | Degrade<br>Drivers: environmental pollution and degradation | Aesthetic value      | Economic well-being | Remunerative | Degradation of natural resources can reduce the amenity of the living environment, resulting in a decrease of the property price in the area. Fluctuation in the property market can negatively influence the local economy(Phaneuf <i>et al.</i> , 2008; Liebelt, Bartke and Schwarz, 2018).<br>Environmental quality, visibility and proximity to the ecosystem can affect this mechanism.                                                                                                                                                                                                   | Negative |
| 3 | Cultural practice: Nature provides opportunity for playing and exercising, creating and expressing, producing and caring, gathering and consuming | Degrade, trade-offs<br>Drivers: tourism development         | Recreation & tourism | Economic well-being | Destructive  | Nature-based tourism development can create enormous benefits to the local economy, however, it also triggers many risks and conflicts to the society and the environment. Unlike regulating or provisioning ESs, cultural ESs are not always positively associated to health of ecosystems. To most places, the increasing tourism revenue reflects the increasing values of cultural ESs for now, but this does not necessarily mean maintain or developing tourism is desirable in the long-term. Environmental degradation associated with extensive tourism development, risks associated | Negative |

|   |                                                                                                                                                      |                                            |                      |                 |             |                                                                                                                                                                                                                                                                                                                                                                                                                                                                                                                                                                                                                                                                                      |          |
|---|------------------------------------------------------------------------------------------------------------------------------------------------------|--------------------------------------------|----------------------|-----------------|-------------|--------------------------------------------------------------------------------------------------------------------------------------------------------------------------------------------------------------------------------------------------------------------------------------------------------------------------------------------------------------------------------------------------------------------------------------------------------------------------------------------------------------------------------------------------------------------------------------------------------------------------------------------------------------------------------------|----------|
|   |                                                                                                                                                      |                                            |                      |                 |             | with changing employment structure in the community and the conflicts among different stakeholders using the resource can influence the economic security and social resilience of the local people(Chen, 2020).                                                                                                                                                                                                                                                                                                                                                                                                                                                                     |          |
| 4 | Cultural practice:<br>Nature provides opportunity for playing and exercising, creating and expressing, producing and caring, gathering and consuming | Degrade Driver:<br>Environmental pollution | Recreation & tourism | Physical health | Destructive | Environmental degradation can pose significant impacts on physical health when people come in contact with the polluted source through recreational activities in nature. For example, People report many problems in skins when coming in contact with contaminated water and/or inhaling aerosolized biotoxins through recreational activities(Willis, 2015). Biodiversity degradation also reduce the benefits ecosystems provide to health and wellbeing, such as nature-based activities and exercising in nature(Johns <i>et al.</i> , 2014). Demographic background of people, accessibility to nature, ES characteristics (quantity & quality) can influence this mechanism. | Negative |

|   |                                                                                         |                                         |                 |                                     |             |                                                                                                                                                                                                                                                                                                                                                                                                              |          |
|---|-----------------------------------------------------------------------------------------|-----------------------------------------|-----------------|-------------------------------------|-------------|--------------------------------------------------------------------------------------------------------------------------------------------------------------------------------------------------------------------------------------------------------------------------------------------------------------------------------------------------------------------------------------------------------------|----------|
| 5 | Form: Physical, tangible or measurable aspects of ecosystem                             | Degrade Driver: Environmental pollution | Aesthetic value | Mental health Subjective well-being | Destructive | Environmental degradation has significant impact on people's mental health and subjective well-being. Exposure to polluted areas affects negatively on people's mood and stress level. Biodiversity degradation also reduces opportunities to enjoy the mental health wellbeing benefits offered by nature(Johns <i>et al.</i> , 2014).                                                                      | Negative |
| 6 | Spiritual practice: Nature provides opportunity for spiritual/religious related matters | Degrade Driver: modernisation           | Spiritual value | Spirituality                        | Destructive | Ritual and religious activities are gradually lost due to environmental degradation and modernisation. As ritual activities are becoming uncommon, the spiritual values associated with specific landscapes and plants are known as a lesser extent. Example: Mining operation in Limpopo Province, South Africa results in loss of communal land and spiritual values associated with it(Shackleton, 2020). | Negative |

|   |                                                                                                                                                      |                                              |                      |              |             |                                                                                                                                                                                                                                                                                                                                                                                                                                                                                                                                                           |  |
|---|------------------------------------------------------------------------------------------------------------------------------------------------------|----------------------------------------------|----------------------|--------------|-------------|-----------------------------------------------------------------------------------------------------------------------------------------------------------------------------------------------------------------------------------------------------------------------------------------------------------------------------------------------------------------------------------------------------------------------------------------------------------------------------------------------------------------------------------------------------------|--|
| 7 | Cultural practice:<br>Nature provides opportunity for playing and exercising, creating and expressing, producing and caring, gathering and consuming | Trade-offs<br>Driver:<br>Tourism development | Recreation & tourism | Spirituality | Destructive | Ecosystems and natural places can invoke spiritual experiences in people(Pike <i>et al.</i> , 2015; Wangai <i>et al.</i> , 2017). In many indigenous communities, the Earth and its elements are living entities and valued for their own sake. Tourism and recreational activities which provide leisure opportunities for improving health and subjective happiness are perceived as violating sacred places. The tourism sector, in some cases, sacrifices spiritual and intrinsic values for the instrumental benefits of its offerings(Winter, 2007) |  |
|---|------------------------------------------------------------------------------------------------------------------------------------------------------|----------------------------------------------|----------------------|--------------|-------------|-----------------------------------------------------------------------------------------------------------------------------------------------------------------------------------------------------------------------------------------------------------------------------------------------------------------------------------------------------------------------------------------------------------------------------------------------------------------------------------------------------------------------------------------------------------|--|

|   |                                                                                                                                |                                                 |                   |                                     |            |                                                                                                                                                                                                                                                                                                                                                                                                                                                                                                                                                                                                                                                                                                                                                                                                                                  |  |
|---|--------------------------------------------------------------------------------------------------------------------------------|-------------------------------------------------|-------------------|-------------------------------------|------------|----------------------------------------------------------------------------------------------------------------------------------------------------------------------------------------------------------------------------------------------------------------------------------------------------------------------------------------------------------------------------------------------------------------------------------------------------------------------------------------------------------------------------------------------------------------------------------------------------------------------------------------------------------------------------------------------------------------------------------------------------------------------------------------------------------------------------------|--|
| 8 | Intellectual practices: interactions with nature provide an environment for learning and gaining new information and knowledge | Trade-offs<br>Driver:<br>Scientific development | Educational value | Spirituality<br>Identity & autonomy | Irritative | Traditional and indigenous people are often against the research potential and educational value in the sacred or spiritually important areas. Researchers are viewed with skepticism by many indigenous people as extensive studies have been conducted in their regions but appear to have little impact on their well-being. The large number of research conducted in the areas creates dissatisfaction of the local people and a reduction in spirituality fulfilment(Cochran <i>et al.</i> , 2008). There are complex issues and multiple barriers (technical, perception, communication, etc.) and different values at place that have alienated the active engagement of indigenous communities in ES management plans(Cochran <i>et al.</i> , 2008; Barnes-Mauthe <i>et al.</i> , 2015; Hiwasaki <i>et al.</i> , 2015). |  |
|---|--------------------------------------------------------------------------------------------------------------------------------|-------------------------------------------------|-------------------|-------------------------------------|------------|----------------------------------------------------------------------------------------------------------------------------------------------------------------------------------------------------------------------------------------------------------------------------------------------------------------------------------------------------------------------------------------------------------------------------------------------------------------------------------------------------------------------------------------------------------------------------------------------------------------------------------------------------------------------------------------------------------------------------------------------------------------------------------------------------------------------------------|--|

|    |                                                                                                                                                      |                                                    |                  |                       |             |                                                                                                                                                                                                                                                                                                                                                                                                   |          |
|----|------------------------------------------------------------------------------------------------------------------------------------------------------|----------------------------------------------------|------------------|-----------------------|-------------|---------------------------------------------------------------------------------------------------------------------------------------------------------------------------------------------------------------------------------------------------------------------------------------------------------------------------------------------------------------------------------------------------|----------|
| 9  | Cultural practice:<br>Nature provides opportunity for playing and exercising, creating and expressing, producing and caring, gathering and consuming | Degrade Driver:<br>biodiversity loss, urbanisation | Knowledge system | Learning & capability | Destructive | With the loss in biodiversity, local people perceive a significant loss in traditional knowledge and skills. This happens through the mechanism of decrease in the supply of the ecosystem services due to biodiversity loss and the decrease in the demand for the services (young people are not interested in traditional and local knowledge and practices)(Castonguay <i>et al.</i> , 2016). | Negative |
| 10 | Cultural practice:<br>Nature provides opportunity for playing and exercising, creating and expressing, producing and caring, gathering and consuming | Degrade Driver:<br>climate change                  | Knowledge system | Learning & capability | Destructive | With the changing climate, the knowledge system becomes somehow unreliable and the farming practices are less productive. In response, many people reported that they had lost confidence in their farming skills and in their ability to predict future weather(Ellis and Albrecht, 2017).<br>The physical condition of the land and seasonal weather conditions can influence this mechanism.   | Negative |



|    |                                                                                                                                                      |                                              |                  |                                          |             |                                                                                                                                                                                                                                                                                                                                                                                                                                                                                                                                                                                                                                      |          |
|----|------------------------------------------------------------------------------------------------------------------------------------------------------|----------------------------------------------|------------------|------------------------------------------|-------------|--------------------------------------------------------------------------------------------------------------------------------------------------------------------------------------------------------------------------------------------------------------------------------------------------------------------------------------------------------------------------------------------------------------------------------------------------------------------------------------------------------------------------------------------------------------------------------------------------------------------------------------|----------|
| 11 | Cultural practice:<br>Nature provides opportunity for playing and exercising, creating and expressing, producing and caring, gathering and consuming | Degrade Driver:<br>biodiversity conservation | Knowledge system | Learning & capability                    | Destructive | There are conflicts between externally initiated biodiversity and natural resource conservation and local traditional practices, leading to a sense of 'madness' to local community. For example, local people perceive that modern conservation management limits their access to resources, hinders their traditional livelihoods, brings bureaucracy, and broadens the gaps between decision-makers and users. Local people feel the modern practices lessen the value of local ecological knowledge and traditional concepts of sustainability, which have developed through centuries of adapting life(Arabi and Nahman, 2020). | Negative |
| 12 | Form: Physical, tangible or measurable aspects of ecosystem                                                                                          | Degrade Driver:<br>environmental degradation | Aesthetic value  | Certainty, sense of control and security | Destructive | There is a sense of fear and insecurity emerged from seeing abrupt and unpredictable social–ecological changes. With the decrease in aesthetic values associated with biodiversity loss and natural disaster, the crime rate and level of insecurity in the local communities increase(Takase, Hadi and Furuya, 2019). People's demographic background and childhood                                                                                                                                                                                                                                                                 | Negative |

|    |                                                                                                                                                   |                                                |                |                                              |             |                                                                                                                                                                                                                                                                                                                                                                                                                                                                                                                                               |          |
|----|---------------------------------------------------------------------------------------------------------------------------------------------------|------------------------------------------------|----------------|----------------------------------------------|-------------|-----------------------------------------------------------------------------------------------------------------------------------------------------------------------------------------------------------------------------------------------------------------------------------------------------------------------------------------------------------------------------------------------------------------------------------------------------------------------------------------------------------------------------------------------|----------|
|    |                                                                                                                                                   |                                                |                |                                              |             | interaction with nature can influence this mechanism                                                                                                                                                                                                                                                                                                                                                                                                                                                                                          |          |
| 13 | Cultural practice: Nature provides opportunity for playing and exercising, creating and expressing, producing and caring, gathering and consuming | Degrade Driver: Social value and belief system | Sense of place | Connectedness & belonging (place attachment) | Destructive | Place attachment is generally perceived as a positive factor and should be promoted to contribute to overall wellbeing. However, in some circumstances, it might also have undesirable and unintended consequences. Extremely high levels of place attachment, place dependency, and local identity might trigger extreme attitudes towards managing ecosystems, in turn hindering the effectiveness of ecosystem management. This may create conflicts in society and negatively impact social relationships(Leviston <i>et al.</i> , 2018). | Negative |
| 14 | Form: Physical, tangible or measurable aspects of ecosystem                                                                                       | Degrade Driver: environmental degradation      | Sense of place | Connectedness & belonging (place attachment) | Destructive | When disrupted, place attachment can negatively impact well-being; relocation through forced or voluntary form can make people suffer from separation from significantly important place. Broken or “stretched” place bonds due to environmental degradation are linked with health issues, lower educational performance, sorrow, longing, alienation, disconnectedness and                                                                                                                                                                  | Negative |

|    |                                                                                                                                                      |                                                              |                         |                                              |             |                                                                                                                                                                                                                                                                                                                                                                       |          |
|----|------------------------------------------------------------------------------------------------------------------------------------------------------|--------------------------------------------------------------|-------------------------|----------------------------------------------|-------------|-----------------------------------------------------------------------------------------------------------------------------------------------------------------------------------------------------------------------------------------------------------------------------------------------------------------------------------------------------------------------|----------|
|    |                                                                                                                                                      |                                                              |                         |                                              |             | disorientation(Leviston <i>et al.</i> , 2018).                                                                                                                                                                                                                                                                                                                        |          |
| 15 | Cultural practice:<br>Nature provides opportunity for playing and exercising, creating and expressing, producing and caring, gathering and consuming | Degrade Driver:<br>environmental degradation, climate change | Social relation         | Connectedness & belonging                    | Destructive | Degradation of natural resources and climate change can have effects on social relations. The reduction in participant number in the events in natural setting can hinder culturally/socially meaningful activities where people establish and sustained social relationship, support and cohesion(Leslie <i>et al.</i> , 2018).                                      | Negative |
| 16 | Cultural practice:<br>Nature provides opportunity for playing and exercising, creating and expressing, producing and caring, gathering and consuming | Degrade Driver:<br>Environmental degradation, modernisation  | Cultural heritage value | Subjective well-being<br>Cultural fulfilment | Destructive | With modernisation and environmental degradation, people feel less attach to the ecosystems. This is associated with a significant reduction in the cultural practices, cultural values, social norms associated with the ecosystems. The decrease in these cultural values leads to a decrease in eudaimonic and experiential wellbeing.(Chou, Huang and Mair, 2018) |          |

|    |                                                                                                                                                      |                                                        |                  |                     |             |                                                                                                                                                                                                                                                                                                                                                                                                                                                                               |          |
|----|------------------------------------------------------------------------------------------------------------------------------------------------------|--------------------------------------------------------|------------------|---------------------|-------------|-------------------------------------------------------------------------------------------------------------------------------------------------------------------------------------------------------------------------------------------------------------------------------------------------------------------------------------------------------------------------------------------------------------------------------------------------------------------------------|----------|
| 17 | Cultural practice:<br>Nature provides opportunity for playing and exercising, creating and expressing, producing and caring, gathering and consuming | Degrade<br>Driver:<br>decline in traditional knowledge | Knowledge system | Identity & autonomy | Destructive | Traditional knowledge is developed and preserved by the communication and transmission of knowledge between individuals and generations. Decline in traditional knowledge due to external drivers can diminish the collective identity of the whole community. Upon abandoning their traditional knowledge and livelihood practices, people perceive a lack of autonomy, question their capacity and struggle to adapt to the new socio-economic conditions(Cetinkaya, 2009). | Negative |
|----|------------------------------------------------------------------------------------------------------------------------------------------------------|--------------------------------------------------------|------------------|---------------------|-------------|-------------------------------------------------------------------------------------------------------------------------------------------------------------------------------------------------------------------------------------------------------------------------------------------------------------------------------------------------------------------------------------------------------------------------------------------------------------------------------|----------|

Note: In describing these pathways, we have chosen to avoid repetitions by focusing on the pathways where the impacts on well-being are not simply the reduction of the services (opposite effects of the counterpart positive pathways) but an additional reaction to the loss of services or trade-offs or underlying factors manifest these circumstances.

**Figure S1: Flowchart of the methodology including article search, inclusion and critical appraisal for the literature review**

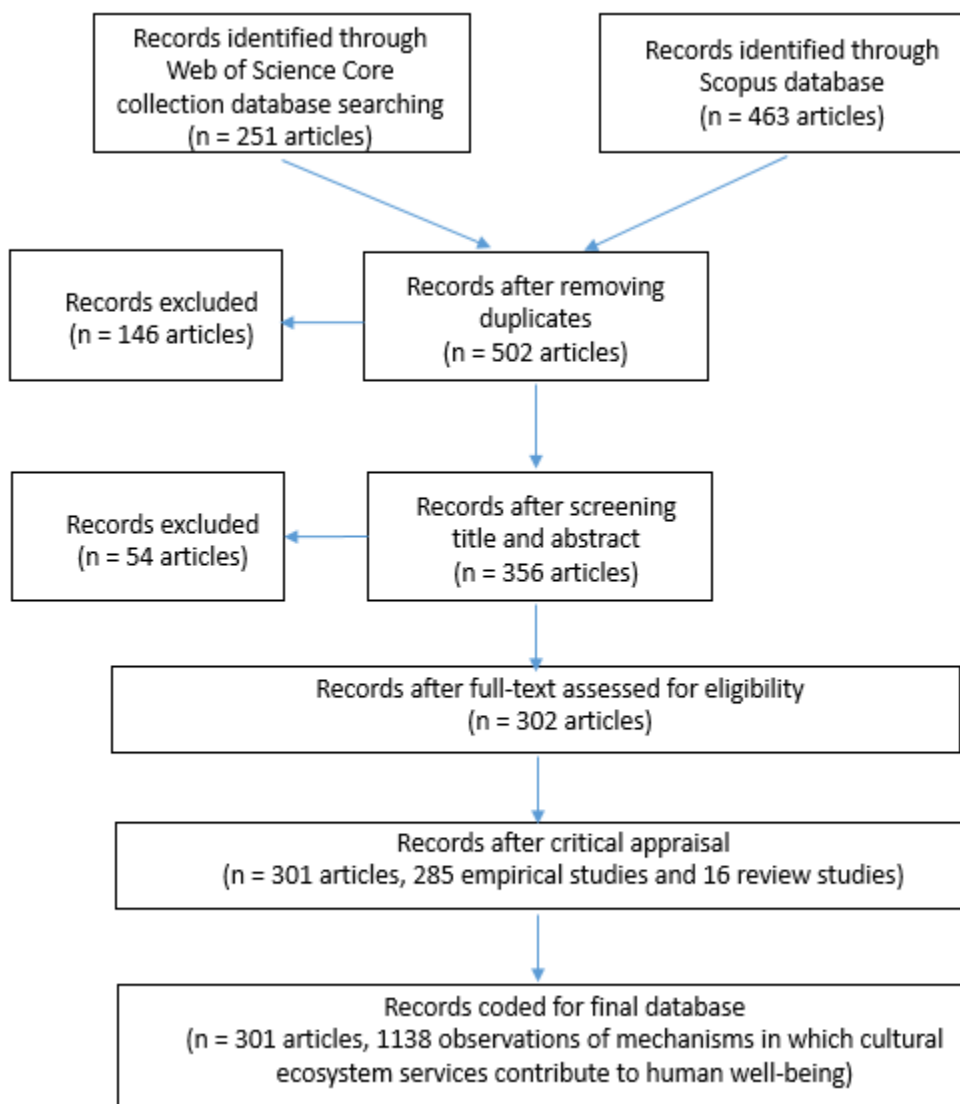

Keywords search:

("Ecosystem\*" OR "Ecosystem service\*" OR "social-ecological system\*" OR "Nature's contribution\*") AND ("cultural ecosystem service\*" OR "aesthetic\*" OR "recreation\*" OR "spiritual\*" OR "inspiration\*" OR "place attachment" OR "social relation\*" OR "knowledge system" OR "sense of place" OR "educational value\*" OR "Non-material nature's contribution\*") AND ("Quality of life" OR "wellbeing" OR "human needs" OR "well-being")

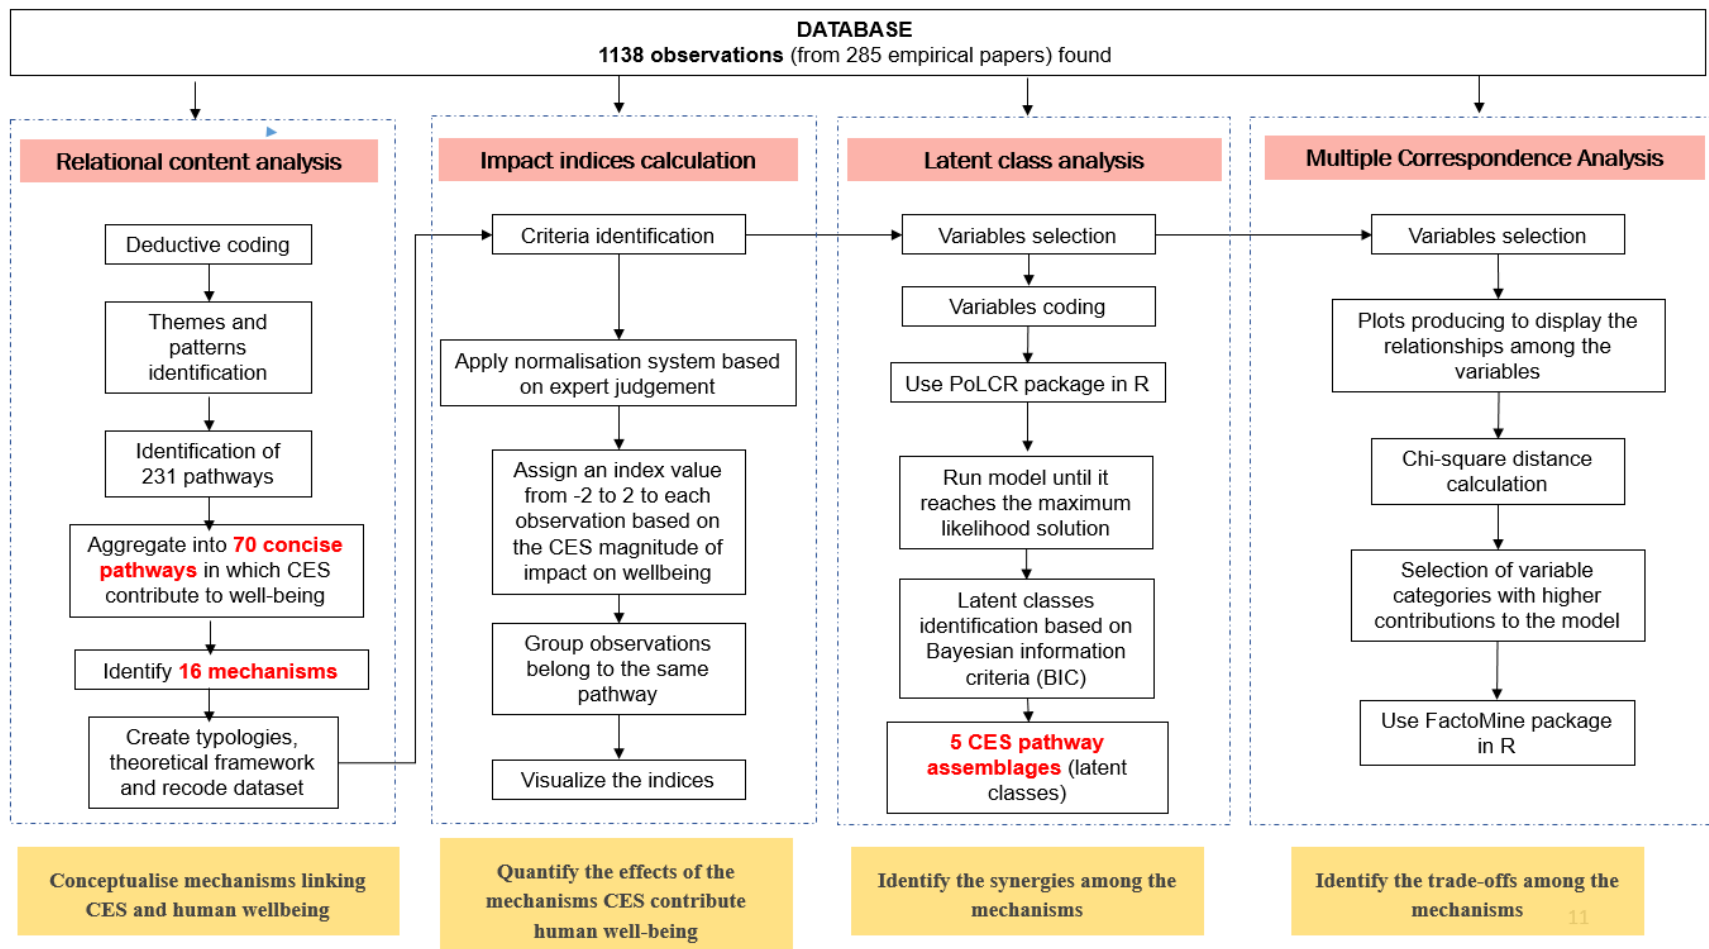

Figure S2: Flowchart of data analysis, from elicitation of mechanisms linking CES and human wellbeing, quantifying the effects of different mechanisms, Latent Class Analysis, and Multiple Correspondence Analysis.

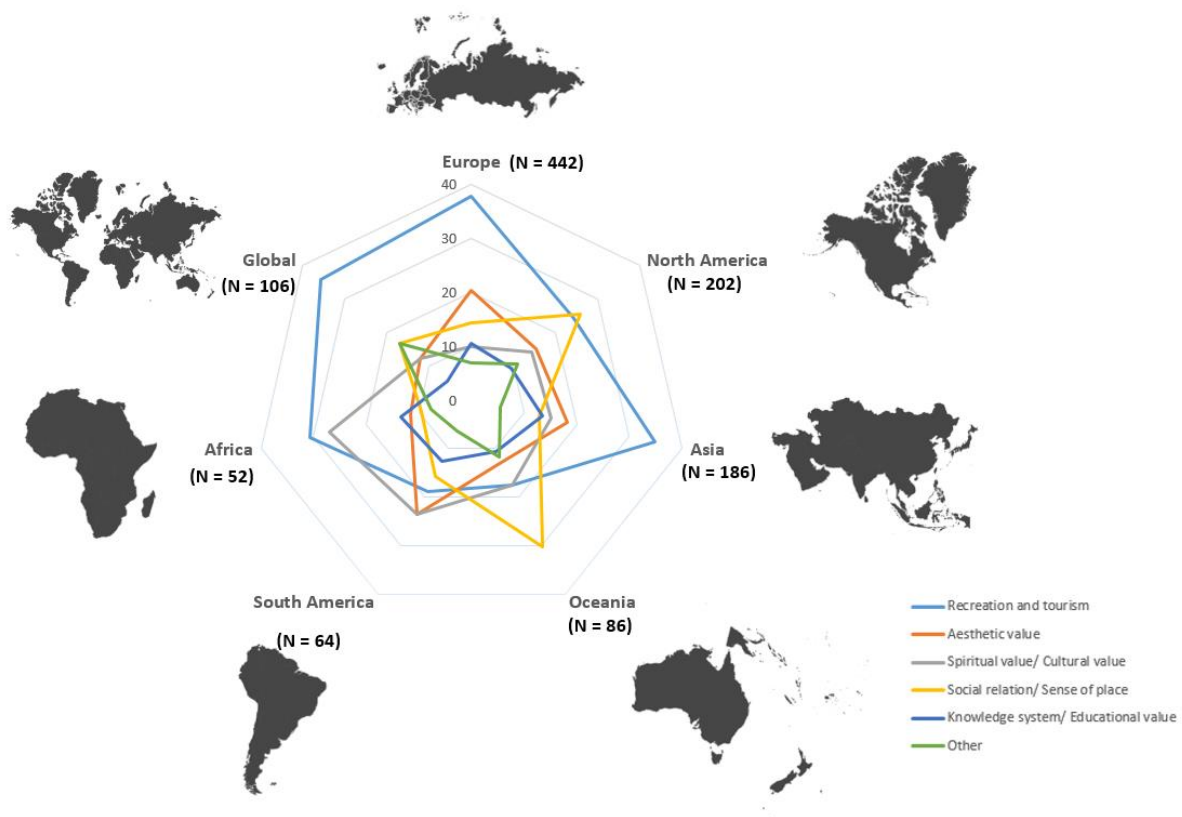

**Figure S3:** Geographical distribution of the observations for the mechanisms in which cultural ecosystem services contribute to human well-being. Radar axes reflect the percentage of observations reflecting each type of CES over the total number of observations for that region.

Among 301 reviewed studies, the authors found 1138 observations of the mechanisms in which CES contribute to human well-being. Different continents have different interests in CES research (Figure 2). The vast majority of CES documented in the academic literature globally are recreation, tourism, and aesthetic value and are mostly found in Europe and Asia. In Oceania and North America, with the large number of indigenous communities, sense of place and social relations are more represented than other services in the research landscape. The identity-landscape connections that refer to the natural environment's impacts on people's identity, cultural and historical development, and relationships with the broader communities are well-known in these regions (Pajak, 2004; Loder, 2014; Sangha and Russell-Smith, 2017). In contrast, spiritual value and cultural heritage value attract more attention in the academic literature in Africa and South America. In these regions, many types of ecosystems that are rich in symbolic expressions often link to people's religion and cultural heritage (de Lacy and Shackleton, 2017; Masterson, Mahajan and Tengö, 2018).

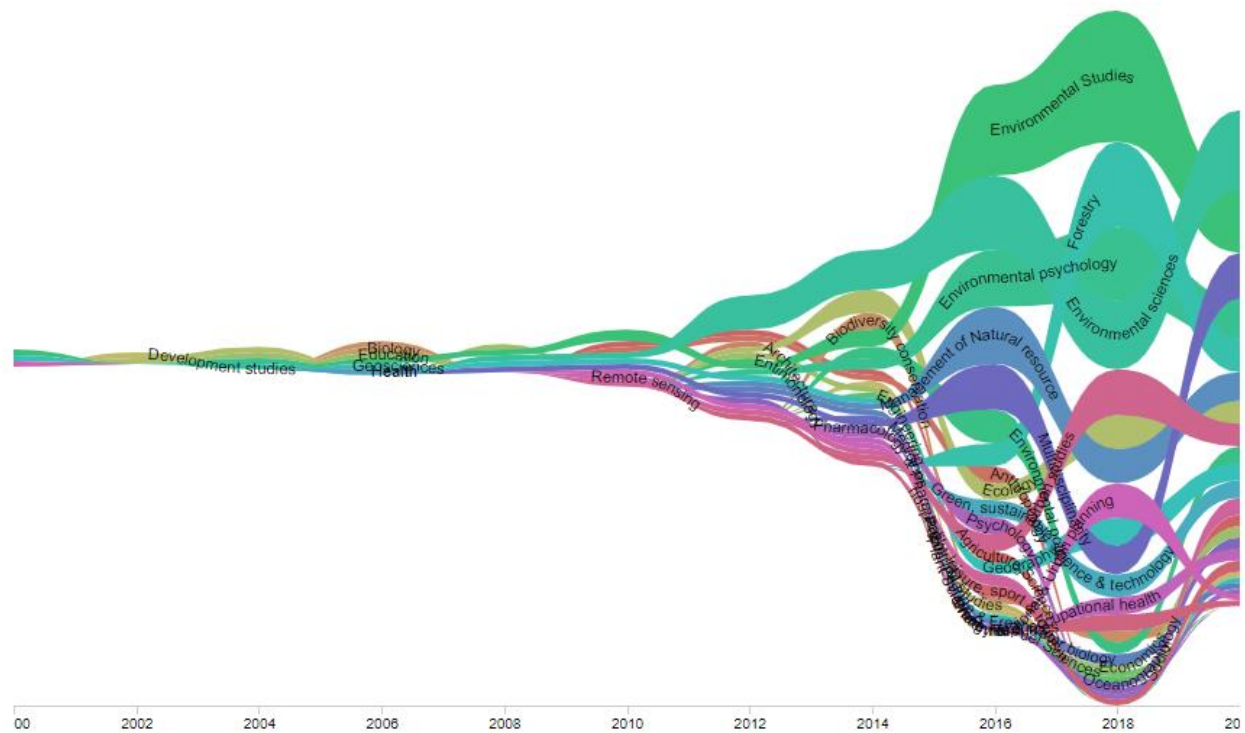

**Figure S4: Interdisciplinary – Evolution of the main academic disciplines represented in the reviewed study.**



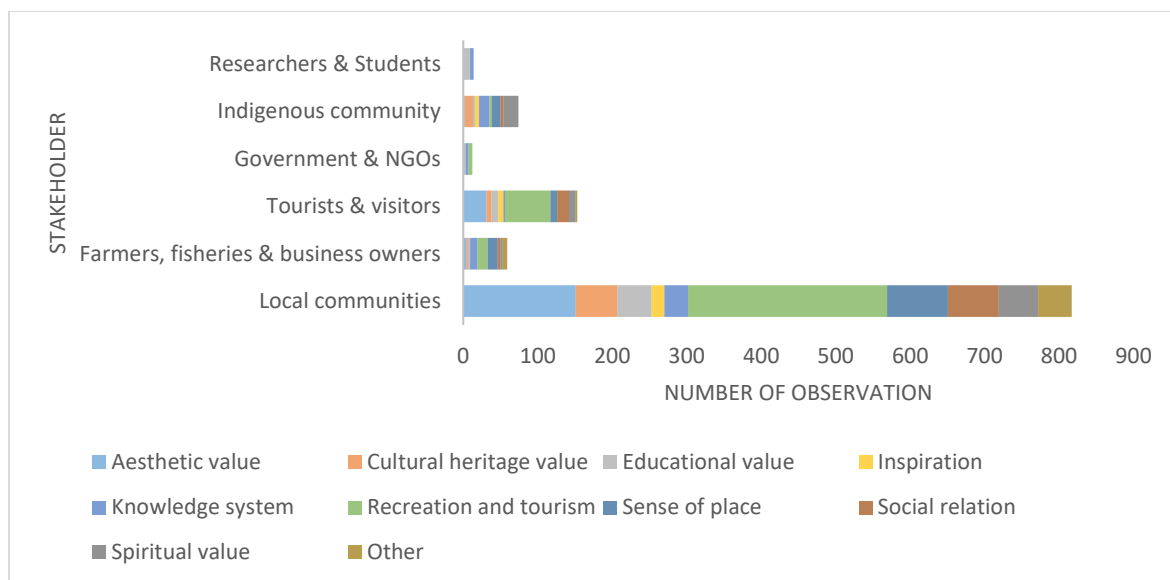

**Figure S5: Number of observation of each cultural ecosystem service type based on different types of stakeholder**

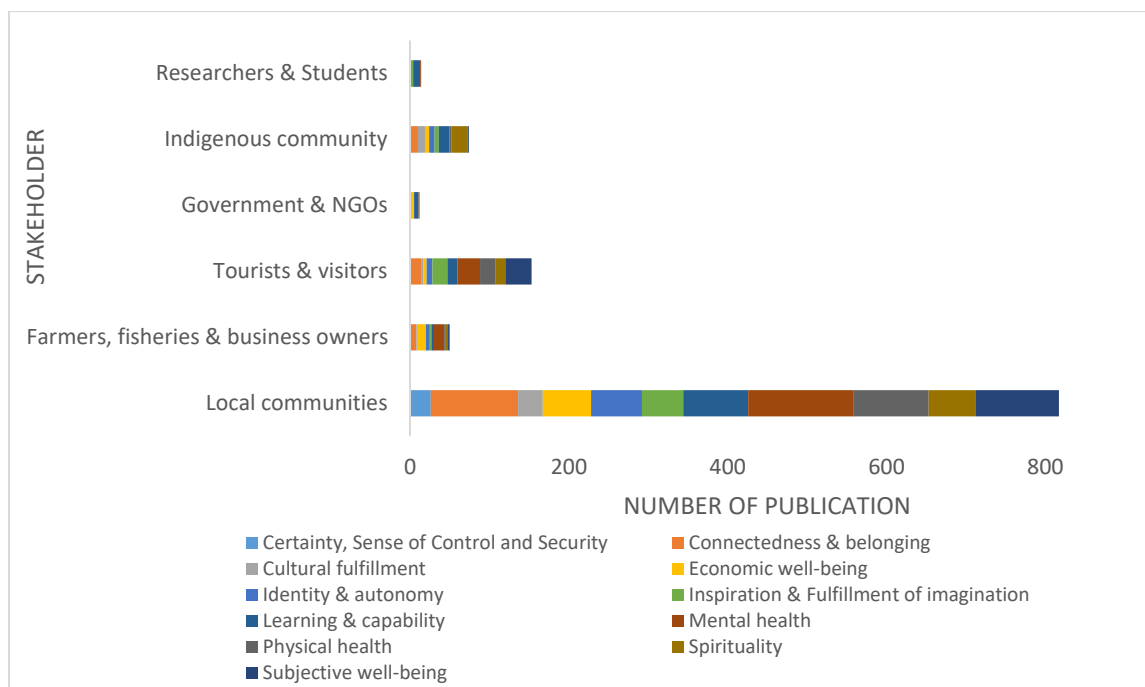

**Figure S6: Number of observation of each constituent of human well-being based on different types of stakeholder**

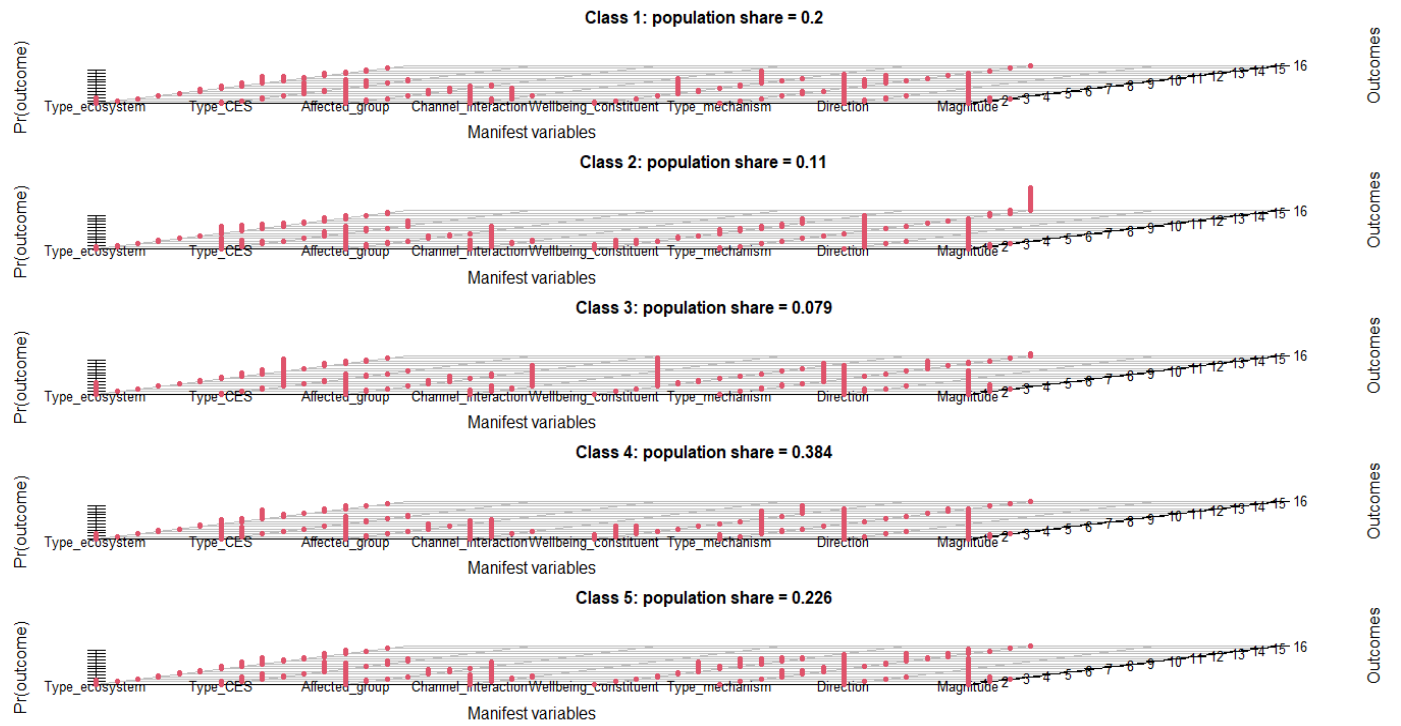

**Figure S7: Likelihood for all variables by latent classes**

## List of reviewed studies

1. Åberg, E. U. & Tapsell, S. Revisiting the River Skerne: The long-term social benefits of river rehabilitation. *Landsc. Urban Plan.* **113**, 94–103 (2013).
2. Adams, H. & Neil Adger, W. The contribution of ecosystem services to place utility as a determinant of migration decision-making. *Environ. Res. Lett.* **8**, (2013).
3. Adhikari, S., Baral, H. & Nitschke, C. R. C. R. Identification, prioritization and mapping of ecosystem services in the Panchase Mountain Ecological Region of Western Nepal. *Forests* **9**, (2018).
4. Adnan, N. Mapping recreation of FRIM via social media. *ASM Sci. J.* **11**, 168–171 (2018).
5. Aguilera-Alcalá, N., Morales-Reyes, Z., Martín-López, B., Moleón, M. & Sánchez-Zapata, J. A. Role of scavengers in providing non-material contributions to people. *Ecol. Indic.* **117**, (2020).
6. Ahtiainen, H. *et al.* Cultural ecosystem services provided by the Baltic Sea marine environment. *Ambio* **48**, 1350–1361 (2019).
7. Ahtiainen, H. *et al.* Public preferences regarding use and condition of the Baltic Sea-An international comparison informing marine policy. *Mar. Policy* **42**, 20–30 (2013).
8. Ainsworth, G. B. G. B., Kenter, J. O. J. O., O'Connor, S., Daunt, F. & Young, J. C. J. C. A fulfilled human life: Eliciting sense of place and cultural identity in two UK marine environments through the Community Voice Method. *Ecosyst. Serv.* **39**, (2019).
9. Amberson, S., Biedenweg, K., James, J. & Christie, P. “The Heartbeat of Our People”: Identifying and Measuring How Salmon Influences Quinault Tribal Wellbeing. *Soc. Nat. Resour.* **29**, 1389–1404 (2016).
10. Amenga-Etego, R. M. Nankani women’s spirituality and ecology. *Worldviews Environ. Cult. Relig.* **20**, 15–29 (2016).
11. Andersson, E., Tengö, M., McPhearson, T. & Kremer, P. Cultural ecosystem services as a gateway for improving urban sustainability. *Ecosyst. Serv.* **12**, 165–168 (2015).
12. Anguelovski, I. *et al.* Expanding the Boundaries of Justice in Urban Greening Scholarship: Toward an Emancipatory, Antisubordination, Intersectional, and Relational Approach. *Ann. Am. Assoc. Geogr.* (2020) doi:10.1080/24694452.2020.1740579.
13. Apsalyamova, S. O., Khachir, B. O. & Khuazhev, O. Z. Development of efficient production and processing of forest products. *Ecol. Environ. Conserv.* **23**, 1774–1780 (2017).
14. Arabi, S. & Nahman, A. Impacts of marine plastic on ecosystem services and economy: State of South African research. *S. Afr. J. Sci.* **116**, (2020).
15. Arriagada, R., Villaseñor, A., Rubiano, E., Cotacachi, D. & Morrison, J. Analysing the impacts of PES programmes beyond economic rationale: Perceptions of ecosystem services provision associated to the Mexican case. *Ecosyst. Serv.* **29**, 116–127 (2018).
16. Artmann, M. *et al.* The role of urban green spaces in care facilities for elderly people across European cities. *Urban For. Urban Green.* **27**, 203–213 (2017).
17. Assmuth, T., Hellgren, D., Kopperoinen, L., Paloniemi, R. & Peltonen, L. Fair blue urbanism: demands, obstacles, opportunities and knowledge needs for just recreation beside Helsinki Metropolitan Area waters. *Int. J. Urban Sustain. Dev.* **9**, 253–273 (2017).
18. Atkinson, G., Bateman, I. & Mourato, S. Recent advances in the valuation of ecosystem services and biodiversity. *Oxford Rev. Econ. Policy* **28**, 22–47 (2012).
19. Auer, A., Maceira, N. & Nahuelhual, L. Agriculturisation and trade-offs between commodity production and cultural ecosystem services: A case study in Balcarce County. *J. Rural Stud.* **53**, 88–101 (2017).
20. Avila-Flores, G., Hinojosa-Arango, G., Juárez-Mancilla, J. & Arizpe-Covarrubias, O. The use of the dspir framework to estimate impacts of Urbanization on mangroves: A case study from La Paz, Baja California Sur, Mexico. *WIT Trans. Ecol. Environ.* **223**, 459–469 (2017).

21. Balkanlou, K. R. *et al.* Spatiotemporal dynamics of ecosystem services provision in a degraded ecosystem: A systematic assessment in the Lake Urmia basin, Iran. *Sci. Total Environ.* **716**, (2020).
22. Barnes-Mauthe, M. *et al.* Social capital as an ecosystem service: Evidence from a locally managed marine area. *Ecosyst. Serv.* **16**, 283–293 (2015).
23. Baur, J. W. R. J. W. R., Tynon, J. F. J. F., Ries, P. & Rosenberger, R. S. R. S. Public attitudes about urban forest ecosystem services management: A case study in Oregon cities. *Urban For. Urban Green.* **17**, 42–53 (2016).
24. Bentley Brymer, A. L. A. L. *et al.* Social-Ecological Processes and Impacts Affect Individual and Social Wellbeing in a Rural Western U.S. Landscape. *Front. Sustain. Food Syst.* **4**, (2020).
25. Berdalet, E. *et al.* Marine harmful algal blooms, human health and wellbeing: Challenges and opportunities in the 21st century. *J. Mar. Biol. Assoc. United Kingdom* **96**, 61–91 (2016).
26. Bewer, R., Xu, W. & Bjornlund, H. Recreational value of irrigation infrastructure: A case study of Chestermere Lake, Alberta, Canada. *WIT Trans. Ecol. Environ.* **168**, 413–424 (2012).
27. Bezák, P., Mederly, P., Izakovičová, Z., Moyzeová, M. & Bezáková, M. Perception of ecosystem services in constituting multi-functional landscapes in Slovakia. *Land* **9**, (2020).
28. Bhuiyan, M. A. H., Ismail, S. M., Siwar, C. & Elfithri, R. The role of natural capital for ecosystem: Focusing on water resource in Pahang, Malaysia. *Life Sci. J.* **11**, 97–101 (2014).
29. Biedenweg, K., Scott, R. P. R. P. & Scott, T. A. T. A. How does engaging with nature relate to life satisfaction? Demonstrating the link between environment-specific social experiences and life satisfaction. *J. Environ. Psychol.* **50**, 112–124 (2017).
30. Bieling, C., Plieninger, T., Pirker, H. & Vogl, C. R. Linkages between landscapes and human wellbeing: An empirical exploration with short interviews. *Ecol. Econ.* **105**, 19–30 (2014).
31. Bielinis, E. *et al.* The effect of recreation in a snow-covered forest environment on the psychological wellbeing of young adults: Randomized controlled study. *Forests* **10**, (2019).
32. Bilbao, B. A., Leal, A. V. & Méndez, C. L. Indigenous Use of Fire and Forest Loss in Canaima National Park, Venezuela. Assessment of and Tools for Alternative Strategies of Fire Management in Pemón Indigenous Lands. *Hum. Ecol.* **38**, 663–673 (2010).
33. Blaen, P. J. P. J., MacDonald, M. A. M. A. & Bradbury, R. B. R. B. Ecosystem services provided by a former gravel extraction site in the UK under two contrasting restoration states. *Conserv. Soc.* **14**, 48–56 (2016).
34. Blau, M. L., Luz, F. & Panagopoulos, T. Urban river recovery inspired by nature-based solutions and biophilic design in Albufeira, Portugal. *Land* **7**, (2018).
35. Bogdan, S. M., Stupariu, I., Andra-Topârceanu, A. & Năstase, I. I. Mapping social values for cultural ecosystem services in a mountain landscape in the Romanian Carpathians. *Carpathian J. Earth Environ. Sci.* **14**, 199–208 (2019).
36. Brancalion, P. H. S. P. H. S., Cardozo, I. V. I. V., Camatta, A., Aronson, J. & Rodrigues, R. R. R. Cultural ecosystem services and popular perceptions of the benefits of an ecological restoration project in the Brazilian Atlantic Forest. *Restor. Ecol.* **22**, 65–71 (2014).
37. Bravo-Vargas, V., García, R. A. R. A., Pizarro, J. C. C. & Pauchard, A. Do people care about pine invasions? Visitor perceptions and willingness to pay for pine control in a protected area. *J. Environ. Manage.* **229**, 57–66 (2019).
38. Bremer, L. L. *et al.* Biocultural restoration of traditional agriculture: Cultural, environmental, and economic outcomes of Lo'i Kalo restoration in He'eia, O'ahu. *Sustain.* **10**, (2018).
39. Bryce, R. *et al.* Subjective wellbeing indicators for large-scale assessment of cultural ecosystem services. *Ecosyst. Serv.* **21**, 258–269 (2016).
40. Budruk, M. & Lee, W. Importance of Managing for Personal Benefits, Hedonic and Utilitarian Motivations, and Place Attachment at an Urban Natural Setting. *Environ. Manage.* **58**, 504–517 (2016).
41. Bullock, C., Joyce, D. & Collier, M. An exploration of the relationships between cultural ecosystem services, socio-cultural values and wellbeing. *Ecosyst. Serv.* **31**, 142–152 (2018).

42. Campagnaro, T. *et al.* General, stress relief and perceived safety preferences for green spaces in the historic city of Padua (Italy). *Urban For. Urban Green.* **52**, (2020).
43. Campbell, L. K. L. K., Svendsen, E. S. E. S., Sonti, N. F. N. F. & Johnson, M. L. M. L. A social assessment of urban parkland: Analyzing park use and meaning to inform management and resilience planning. *Environ. Sci. Policy* **62**, 34–44 (2016).
44. Camps-Calvet, M., Langemeyer, J., Calvet-Mir, L. & Gómez-Baggethun, E. Ecosystem services provided by urban gardens in Barcelona, Spain: Insights for policy and planning. *Environ. Sci. Policy* **62**, 14–23 (2016).
45. Caneday, L., Jordan, D. & Liang, Y. Management policy in and typology of state park systems. *Am. J. Environ. Sci.* **5**, 187–196 (2009).
46. Caputo, J., Beier, C. M., Luzadis, V. A. & Groffman, P. M. Integrating beneficiaries into assessment of ecosystem services from managed forests at the Hubbard Brook Experimental Forest, USA. *For. Ecosyst.* **3**, (2016).
47. Castillo-Eguskitza, N., Hoyos, D., Onaindia, M. & Czajkowski, M. Unraveling local preferences and willingness to pay for different management scenarios: A choice experiment to biosphere reserve management. *Land use policy* **88**, (2019).
48. Castonguay, A. C., Burkhard, B., Müller, F., Horgan, F. G. & Settele, J. Resilience and adaptability of rice terrace social-ecological systems: A case study of a local community's perception in Banaue, Philippines. *Ecol. Soc.* **21**, (2016).
49. Cetinkaya, G. Challenges for the maintenance of traditional knowledge in the Satoyama and Satoumi ecosystems, Noto Peninsula, Japan. *Hum. Ecol. Rev.* **16**, 27–40 (2009).
50. Chakraborty, S. & Gasparatos, A. Community values and traditional knowledge for coastal ecosystem services management in the “satoumi” seascape of Himeshima island, Japan. *Ecosyst. Serv.* **37**, (2019).
51. Chan, C. S. Health-related elements in green space branding in Hong Kong. *Urban For. Urban Green.* **21**, 192–202 (2017).
52. Chen, B. & Liang, L. Old-Growth Trees in Homesteads on the Ryukyu Archipelago, Japan: Uses, Management, and Conservation. *Small-scale For.* **19**, 39–56 (2020).
53. Chen, H. Complementing conventional environmental impact assessments of tourism with ecosystem service valuation: A case study of the Wulingyuan Scenic Area, China. *Ecosyst. Serv.* **43**, (2020).
54. Chen, Y., Caesemaeker, C., Rahman, H. T. H. T. & Sherren, K. Comparing cultural ecosystem service delivery in dykelands and marshes using Instagram: A case of the Cornwallis (Jijuktu'kwejk) River, Nova Scotia, Canada. *Ocean Coast. Manag.* **193**, (2020).
55. Chusrinuan, N., Tanavud, C. & Yongchalermchai, C. Impacts of shoreline erosion on coastal ecosystems in Songkhla Province. *Songklanakarin J. Sci. Technol.* **31**, 237–245 (2009).
56. Ciftcioglu, G. C. G. C., Ebedi, S. & Abak, K. Evaluation of the relationship between ornamental plants – based ecosystem services and human wellbeing: A case study from Lefke Region of North Cyprus. *Ecol. Indic.* **102**, 278–288 (2019).
57. Clara, I. *et al.* The value of coastal lagoons: Case study of recreation at the Ria de Aveiro, Portugal in comparison to the Coorong, Australia. *J. Nat. Conserv.* **43**, 190–200 (2018).
58. Colavitti, A. M., Floris, A. & Serra, S. Urban standards and ecosystem services: The evolution of the services planning in Italy from theory to practice. *Sustain.* **12**, (2020).
59. Cook, D., Davíðsdóttir, B. & Kristófersson, D. M. D. M. An ecosystem services perspective for classifying and valuing the environmental impacts of geothermal power projects. *Energy Sustain. Dev.* **40**, 126–138 (2017).
60. Cox, D. T. C. *et al.* Covariation in urban birds providing cultural services or disservices and people. *J. Appl. Ecol.* **55**, 2308–2319 (2018).
61. Dade, M. C., Mitchell, M. G. E., Brown, G. & Rhodes, J. R. The effects of urban greenspace characteristics and socio-demographics vary among cultural ecosystem services. *Urban For. Urban Green.* **49**, (2020).

62. Dai, G. *et al.* On the relationship between economic development, environmental integrity and wellbeing: The point of view of herdsmen in northern China grassland. *PLoS One* **10**, (2015).
63. Dai, P., Zhang, S., Hou, H., Yang, Y. & Liu, R. Valuing sports services in urban parks: A new model based on social network data. *Ecosyst. Serv.* **36**, (2019).
64. Dai, Z., Puyang, X. & Han, L. Using assessment of net ecosystem services to promote sustainability of golf course in China. *Ecol. Indic.* **63**, 165–171 (2016).
65. Dallimer, M. *et al.* Quantifying preferences for the natural world using monetary and nonmonetary assessments of value. *Conserv. Biol.* **28**, 404–413 (2014).
66. Darvill, R. & Lindo, Z. The inclusion of stakeholders and cultural ecosystem services in land management trade-off decisions using an ecosystem services approach. *Landsc. Ecol.* **31**, 533–545 (2016).
67. de Bell, S., Graham, H. & White, P. C. L. Evaluating dual ecological and wellbeing benefits from an urban restoration project. *Sustain.* **12**, (2020).
68. De la Barrera, F., Reyes-Paecke, S., Harris, J., Bascuñán, D. & Farías, J. M. People's perception influences on the use of green spaces in socio-economically differentiated neighborhoods. *Urban For. Urban Green.* **20**, 254–264 (2016).
69. de Lacy, P. & Shackleton, C. Aesthetic and spiritual ecosystem services provided by urban sacred sites. *Sustain.* **9**, (2017).
70. De Valck, J. *et al.* Valuing urban ecosystem services in sustainable brownfield redevelopment. *Ecosyst. Serv.* **35**, 139–149 (2019).
71. Depellegrin, D., Menegon, S., Gusatu, L., Roy, S. & Misiunè, I. Assessing marine ecosystem services richness and exposure to anthropogenic threats in small sea areas: A case study for the Lithuanian sea space. *Ecol. Indic.* **108**, (2020).
72. Díaz, M. E., Figueroa, R., Alonso, M. L. S. & Vidal-Abarca, M. R. Exploring the complex relations between water resources and social indicators: The Biobío Basin (Chile). *Ecosyst. Serv.* **31**, 84–92 (2018).
73. Dorji, T. *et al.* Socio-cultural values of ecosystem services from Oak Forests in the Eastern Himalaya. *Sustain.* **11**, (2019).
74. Dou, Y. *et al.* Analysis of the relationship between cross-cultural perceptions of landscapes and cultural ecosystem services in Genheyuan region, Northeast China. *Ecosyst. Serv.* **43**, (2020).
75. Dou, Y., Zhen, L., De Groot, R., Du, B. & Yu, X. Assessing the importance of cultural ecosystem services in urban areas of Beijing municipality. *Ecosyst. Serv.* **24**, 79–90 (2017).
76. Egerer, M., Ordóñez, C., Lin, B. B. & Kendal, D. Multicultural gardeners and park users benefit from and attach diverse values to urban nature spaces. *Urban For. Urban Green.* **46**, (2019).
77. Ellis, N. R. N. R. & Albrecht, G. A. G. A. Climate change threats to family farmers' sense of place and mental wellbeing: A case study from the Western Australian Wheatbelt. *Soc. Sci. Med.* **175**, 161–168 (2017).
78. Elwell, T. L., López-Carr, D., Gelcich, S. & Gaines, S. D. The importance of cultural ecosystem services in natural resource-dependent communities: Implications for management. *Ecosyst. Serv.* **44**, (2020).
79. Ezealor, A. U. & Giles, R. H. Vertebrate pests of a sahelian wetland agro-ecosystem: Perceptions and attitudes of the indigenes and potential management strategies. *Int. J. Pest Manag.* **43**, 97–104 (1997).
80. Felipe-Lucia, M. R. *et al.* Ecosystem services flows: Why stakeholders' power relationships matter. *PLoS One* **10**, (2015).
81. Fink, H. S. Human-nature for climate action: Nature-based solutions for urban sustainability. *Sustain.* **8**, (2016).
82. Fish, R. *et al.* Making space for cultural ecosystem services: Insights from a study of the UK nature improvement initiative. *Ecosyst. Serv.* **21**, 329–343 (2016).

83. Flores-Díaz, A. C., Chacón, A. Q., Bistrain, R. P., Ramírez, M. I. & Larrazábal, A. Community-based monitoring in response to local concerns: Creating usable knowledge for water management in rural land. *Water (Switzerland)* **10**, (2018).
84. Fortnam, M. *et al.* The Gendered Nature of Ecosystem Services. *Ecol. Econ.* **159**, 312–325 (2019).
85. García-Llorente, M., Rossignoli, C. M., Di Iacovo, F. & Moruzzo, R. Social farming in the promotion of social-ecological sustainability in rural and periurban areas. *Sustain.* **8**, (2016).
86. Ghasemi, M. M., Lamit, H. & Shafaghat, A. The association between riverscape and place attachment in historical cities in Malaysia. *J. Teknol.* **70**, 147–154 (2014).
87. Gliozzo, G., Pettorelli, N. & Muki Haklay, M. Using crowdsourced imagery to detect cultural ecosystem services: A case study in South Wales, UK. *Ecol. Soc.* **21**, (2016).
88. Gould, R. K. *et al.* The forest has a story: Cultural ecosystem services in Kona, Hawai‘i. *Ecol. Soc.* **19**, (2014).
89. Gould, R. K. R. K. *et al.* A protocol for eliciting nonmaterial values through a cultural ecosystem services frame. *Conserv. Biol.* **29**, 575–586 (2015).
90. Gouwakinnou, G. N. *et al.* Local perceptions and factors determining ecosystem services identification around two forest reserves in Northern Benin. *J. Ethnobiol. Ethnomed.* **15**, (2019).
91. Graymore, M. L. M. & McBride, D. Socio-ecological value of wetlands: The dilemma of balancing human and ecological water needs. *Australas. J. Environ. Manag.* **20**, 225–241 (2013).
92. Grilli, G., Nikodinoska, N., Paletto, A. & De Meo, I. Stakeholders’ preferences and economic value of forest ecosystem services: An example in the Italian alps. *Balt. For.* **21**, 298–307 (2015).
93. Grizzetti, B. *et al.* Relationship between ecological condition and ecosystem services in European rivers, lakes and coastal waters. *Sci. Total Environ.* **671**, 452–465 (2019).
94. Gul, E. & Chaudhry, I. S. Socio-economic context of saving biodiversity. *J. Environ. Manag. Tour.* **4**, (2013).
95. Gutberlet, M. Geopolitical imaginaries and Cultural Ecosystem Services (CES) in the desert. *Tour. Geogr.* (2019) doi:10.1080/14616688.2018.1545250.
96. Hartig, T., Kaiser, F. G. & Strumse, E. Psychological restoration in nature as a source of motivation for ecological behaviour. *Environ. Conserv.* **34**, 291–299 (2007).
97. Hashimoto, S. *et al.* Mapping and characterizing ecosystem services of social–ecological production landscapes: case study of Noto, Japan. *Sustain. Sci.* **10**, 257–273 (2015).
98. Häyhä, T., Franzese, P. P., Paletto, A. & Fath, B. D. Assessing, valuing, and mapping ecosystem services in Alpine forests. *Ecosyst. Serv.* **14**, 12–23 (2015).
99. Helen & Gasparatos, A. Ecosystem services provision from urban farms in a secondary city of Myanmar, pyin oo lwin. *Agric.* **10**, (2020).
100. Henke, J. M. J. M. & Petropoulos, G. P. G. P. A GIS-based exploration of the relationships between human health, social deprivation and ecosystem services: The case of Wales, UK. *Appl. Geogr.* **45**, 77–88 (2013).
101. Hermes, J., Albert, C. & von Haaren, C. Assessing the aesthetic quality of landscapes in Germany. *Ecosyst. Serv.* **31**, 296–307 (2018).
102. Holmgren, M. & Scheffer, M. To Tree or Not to Tree: Cultural Views from Ancient Romans to Modern Ecologists. *Ecosystems* **20**, 62–68 (2017)
103. Holt, A. R. *et al.* Mismatches between legislative frameworks and benefits restrict the implementation of the Ecosystem Approach in coastal environments. *Mar. Ecol. Prog. Ser.* **434**, 213–228 (2011).
104. Hong, W. & Guo, R. Indicators for quantitative evaluation of the social services function of urban greenbelt systems: A case study of shenzhen, China. *Ecol. Indic.* **75**, 259–267 (2017).
105. Hoyle, H. *et al.* Plant species or flower colour diversity? Identifying the drivers of public and invertebrate response to designed annual meadows. *Landsc. Urban Plan.* **180**, 103–113 (2018).

106. Hsieh, H.-L., Lin, H.-J., Shih, S.-S. & Chen, C.-P. Ecosystem functions connecting contributions from ecosystem services to human wellbeing in a mangrove system in Northern Taiwan. *Int. J. Environ. Res. Public Health* **12**, 6542–6560 (2015).
107. Hunter, M. R. Impact of ecological disturbance on awareness of urban nature and sense of environmental stewardship in residential neighborhoods. *Landsc. Urban Plan.* **101**, 131–138 (2011).
108. Hussain, R. I. R. I. *et al.* Management of mountainous meadows associated with biodiversity attributes, perceived health benefits and cultural ecosystem services. *Sci. Rep.* **9**, (2019).
109. Ingram, R. J., Oleson, K. L. L. & Gove, J. M. Revealing complex social-ecological interactions through participatory modeling to support ecosystem-based management in Hawai'i. *Mar. Policy* **94**, 180–188 (2018).
110. Jahanifar, K., Amirnejad, H., Abedi, Z. & Vafaeinejad, A. Estimation of the value of forest ecosystem services to develop conservational strategy management (strengths, weaknesses, opportunities and threats). *J. For. Sci.* **63**, 300–312 (2017).
111. Jansson, R. *et al.* Future changes in the supply of goods and services from natural ecosystems: Prospects for the European North. *Ecol. Soc.* **20**, (2015).
112. Jennings, V. & Gaither, C. J. Approaching environmental health disparities and green spaces: An ecosystem services perspective. *Int. J. Environ. Res. Public Health* **12**, 1952–1968 (2015).
113. Jim, C. Y. & Chen, W. Y. Ecosystem services and valuation of urban forests in China. *Cities* **26**, 187–194 (2009).
114. Jiricka-Pürner, A. *et al.* Do protected areas contribute to health and wellbeing? A cross-cultural comparison. *Int. J. Environ. Res. Public Health* **16**, (2019).
115. Johansson, M., Pedersen, E. & Weisner, S. Assessing cultural ecosystem services as individuals' place-based appraisals. *Urban For. Urban Green.* **39**, 79–88 (2019).
116. Johnston, J. R., Needham, M. D., Cramer, L. A. & Swearingen, T. C. Public Values and Attitudes toward Marine Reserves and Marine Wilderness. *Coast. Manag.* **48**, 142–163 (2020).
117. Kaltenborn, B. P. *et al.* Ecosystem Services and Cultural Values as Building Blocks for 'The Good life'. A Case Study in the Community of Røst, Lofoten Islands, Norway. *Ecol. Econ.* **140**, 166–176 (2017).
118. Kaltenborn, B. P., Linnell, J. D. C. & Gómez-Baggethun, E. Can cultural ecosystem services contribute to satisfying basic human needs? A case study from the Lofoten archipelago, northern Norway. *Appl. Geogr.* **120**, (2020).
119. Kamiyama, C., Hashimoto, S., Kohsaka, R. & Saito, O. Non-market food provisioning services via homegardens and communal sharing in satoyama socio-ecological production landscapes on Japan's Noto peninsula. *Ecosyst. Serv.* **17**, 185–196 (2016).
120. Kandel, P. *et al.* Understanding social-ecological interdependence using ecosystem services perspective in Bhutan, Eastern Himalayas: *Ecosphere* **9**, (2018).
121. Kašanin-Grubin, M. *et al.* Future environmental challenges of the urban protected area Great War Island (Belgrade, Serbia) based on valuation of the pollution status and ecosystem services. *J. Environ. Manage.* **251**, (2019).
122. Kenter, J. O. J. O. *et al.* The impact of information, value-deliberation and group-based decision-making on values for ecosystem services: Integrating deliberative monetary valuation and storytelling. *Ecosyst. Serv.* **21**, 270–290 (2016).
123. Khakzad, S. & Griffith, D. The role of fishing material culture in communities' sense of place as an added-value in management of coastal areas. *J. Mar. Isl. Cult.* **5**, 95–117 (2016).
124. Kil, N., Stein, T. V., Holland, S. M. & Anderson, D. H. Understanding place meanings in planning and managing the wildland-urban interface: The case of Florida trail hikers. *Landsc. Urban Plan.* **107**, 370–379 (2012).



125. King, H. P. *et al.* Biodiversity and cultural ecosystem benefits in lowland landscapes in southern England. *J. Environ. Psychol.* **53**, 185–197 (2017).
126. Knez, I. & Eliasson, I. Relationships between personal and collective place identity and wellbeing in mountain communities. *Front. Psychol.* **8**, (2017).
127. Kopecká, M., Szatmári, D. & Rosina, K. Analysis of urban green spaces based on sentinel-2A: Case studies from Slovakia<sup>†</sup>. *Land* **6**, (2017).
128. Kothencz, G., Kolcsár, R., Cabrera-Barona, P. & Szilassi, P. Urban green space perception and its contribution to wellbeing. *Int. J. Environ. Res. Public Health* **14**, (2017).
129. Kreitler, J., Papenfus, M., Byrd, K. & Labiosa, W. Interacting Coastal Based Ecosystem Services: Recreation and Water Quality in Puget Sound, WA. *PLoS One* **8**, (2013).
130. Kurdoğlu, B. Ç. & Kurt, S. S. Determination of greenway routes using network analysis in Amasya, Turkey. *J. Urban Plan. Dev.* **143**, (2017).
131. L'Ecuyer-Sauvageau, C. *et al.* Understanding the preferences of water users in a context of cyanobacterial blooms in Quebec. *J. Environ. Manage.* **248**, (2019).
132. Lange, E., Hehl-Lange, S. & Brewer, M. J. Scenario-visualization for the assessment of perceived green space qualities at the urban-rural fringe. *J. Environ. Manage.* **89**, 245–256 (2008).
133. Langemeyer, J., Baró, F., Roebeling, P. & Gómez-Baggethun, E. Contrasting values of cultural ecosystem services in urban areas: The case of park Montjuïc in Barcelona. *Ecosyst. Serv.* **12**, 178–186 (2015).
134. Lankia, T., Kopperoinen, L., Pouta, E. & Neuvonen, M. Valuing recreational ecosystem service flow in Finland. *J. Outdoor Recreat. Tour.* **10**, 14–28 (2015).
135. Larson, K. L. *et al.* Subjective evaluations of ecosystem services and disservices: an approach to creating and analyzing robust survey scales. *Ecol. Soc.* **24**, (2019).
136. Lau, J. D., Hicks, C. C., Gurney, G. G. & Cinner, J. E. What matters to whom and why? Understanding the importance of coastal ecosystem services in developing coastal communities. *Ecosyst. Serv.* **35**, 219–230 (2019).
137. Lega, M. *et al.* Environmental Data Acquisition, Elaboration and Integration: Preliminary Application to a Vulnerable Mountain Landscape and Village (Novalesa, NW Italy). *Engineering* **4**, 635–642 (2018).
138. Leitão, I. A., Ferreira, C. S. S. & Ferreira, A. J. D. Assessing long-term changes in potential ecosystem services of a peri-urbanizing Mediterranean catchment. *Sci. Total Environ.* **660**, 993–1003 (2019).
139. Leong, K. M., Wongbusarakum, S., Ingram, R. J., Mawyer, A. & Poe, M. Improving representation of human wellbeing and cultural importance in conceptualizing the West Hawai'i ecosystem. *Front. Mar. Sci.* **6**, (2019).
140. Leslie, M. *et al.* Bringing social and cultural considerations into environmental management for vulnerable coastal communities: Responses to environmental change in Xuan Thuy National Park, Nam Dinh Province, Vietnam. *Ocean Coast. Manag.* **158**, 32–44 (2018).
141. Leviston, Z., Walker, I., Green, M. & Price, J. Linkages between ecosystem services and human wellbeing: A Nexus Webs approach. *Ecol. Indic.* **93**, 658–668 (2018).
142. Liebelt, V., Bartke, S. & Schwarz, N. Hedonic pricing analysis of the influence of urban green spaces onto residential prices: the case of Leipzig, Germany. *Eur. Plan. Stud.* **26**, 133–157 (2018).
143. Lindberg, K., Swearingen, T. & White, E. M. E. M. Parallel Subjective Wellbeing and Choice Experiment Evaluation of Ecosystem Services: Marine and Forest Reserves in Coastal Oregon, USA. *Soc. Indic. Res.* **149**, 347–374 (2020).
144. Liu, Y., Bailey, J. L. & Davidsen, J. G. Social-cultural ecosystem services of sea trout recreational fishing in Norway. *Front. Mar. Sci.* **6**, (2019).
145. Loder, A. 'There's a meadow outside my workplace': A phenomenological exploration of aesthetics and green roofs in Chicago and Toronto. *Landsc. Urban Plan.* **126**, 94–106 (2014).

146. Loram, A., Warren, P., Thompson, K. & Gaston, K. Urban domestic gardens: The effects of human interventions on garden composition. *Environ. Manage.* **48**, 808–824 (2011).
147. Lucrezi, S. & van der Walt, M. F. M. F. Beachgoers' perceptions of sandy beach conditions: demographic and attitudinal influences, and the implications for beach ecosystem management. *J. Coast. Conserv.* **20**, 81–96 (2016).
148. Lyver, P. O. *et al.* Key Māori values strengthen the mapping of forest ecosystem services. *Ecosyst. Serv.* **27**, 92–102 (2017).
149. Maestre-Andrés, S., Calvet-Mir, L. & van den Bergh, J. C. J. M. Sociocultural valuation of ecosystem services to improve protected area management: a multi-method approach applied to Catalonia, Spain. *Reg. Environ. Chang.* **16**, 717–731 (2016).
150. Marafa, L. M., Tsang, F., Watts, G. & Xu, Y. Perceived tranquility in green urban open spaces. *World Leis. J.* **60**, 221–234 (2018).
151. Marshall, N. A., Dunstan, P., Pert, P. & Thiault, L. How people value different ecosystems within the Great Barrier Reef. *J. Environ. Manage.* **243**, 39–44 (2019).
152. Marshall, N. *et al.* Reef Grief: investigating the relationship between place meanings and place change on the Great Barrier Reef, Australia. *Sustain. Sci.* **14**, 579–587 (2019).
153. Martin, C. L. C. L., Momtaz, S., Gaston, T. & Moltschaniwskyj, N. A. N. A. Estuarine cultural ecosystem services valued by local people in New South Wales, Australia, and attributes important for continued supply. *Ocean Coast. Manag.* **190**, (2020).
154. Martin, C. L., Momtaz, S., Gaston, T. & Moltschaniwskyj, N. A. A systematic quantitative review of coastal and marine cultural ecosystem services: Current status and future research. *Mar. Policy* **74**, 25–32 (2016).
155. Martins, F. *et al.* Promoting tourism businesses for “Salgado de Aveiro” rehabilitation. *J. Outdoor Recreat. Tour.* **29**, (2020).
156. Masterson, V. A., Mahajan, S. L. & Tengö, M. Photovoice for mobilizing insights on human wellbeing in complex social-ecological systems: Case studies from Kenya and South Africa. *Ecol. Soc.* **23**, (2018).
157. Matuk, F. A. *et al.* Allying knowledge integration and co-production for knowledge legitimacy and usability: The Amazonian SISA policy and the Kaxinawá Indigenous people case. *Environ. Sci. Policy* **112**, 1–9 (2020).
158. Matuk, F. A. *et al.* Including diverse knowledges and worldviews in environmental assessment and planning: the Brazilian Amazon Kaxinawá Nova Olinda Indigenous Land case. *Ecosyst. People* **16**, 95–113 (2020).
159. Matzek, V., Wilson, K. A. & Kragt, M. Mainstreaming of ecosystem services as a rationale for ecological restoration in Australia. *Ecosyst. Serv.* **35**, 79–86 (2019).
160. McDaniel, J. & Alley, K. D. Connecting local environmental knowledge and land use practices: A human ecosystem approach to urbanization in West Georgia. *Urban Ecosyst.* **8**, 23–38 (2005).
161. McDougall, C. W. C. W., Hanley, N., Quilliam, R. S. R. S., Needham, K. & Oliver, D. M. D. M. Valuing inland blue space: A contingent valuation study of two large freshwater lakes. *Sci. Total Environ.* **715**, (2020).
162. McMillen, H., Campbell, L. K., Svendsen, E. S. & Reynolds, R. Recognizing stewardship practices as indicators of social resilience: In living memorials and in a community garden. *Sustain.* **8**, (2016).
163. Meng, S. *et al.* Matches and mismatches between the supply of and demand for cultural ecosystem services in rapidly urbanizing watersheds: A case study in the Guanting Reservoir basin, China. *Ecosyst. Serv.* **45**, (2020).
164. Mesimäki, M., Hauru, K. & Lehvävirta, S. Do small green roofs have the possibility to offer recreational and experiential benefits in a dense urban area? A case study in Helsinki, Finland. *Urban For. Urban Green.* **40**, 114–124 (2019).

165. Moseley, D., Connolly, T., Sing, L. & Watts, K. Developing an indicator for the physical health benefits of recreation in woodlands. *Ecosyst. Serv.* **31**, 420–432 (2018).
166. Moyzeova, M. Inclusion of the public in the natural capital, ecosystem services and green infrastructure assessments (Results of structured interviews with stakeholders of commune Liptovská Teplička). *Ekol. Bratislava* **37**, 42–56 (2018).
167. Mukhopadhyay, P., Ghosh, S., Costa, V. D. & Pednekar, S. Recreational value of coastal and marine ecosystems in India: A macro approach. *Tour. Mar. Environ.* **15**, 1–17 (2020).
168. Munyati, C. & Drummond, J. H. Loss of urban green spaces in Mafikeng, South Africa. *World Dev. Perspect.* (2020) doi:10.1016/j.wdp.2020.100226.
169. Murphy, A., Enqvist, J. P. & Tengö, M. Place-making to transform urban social–ecological systems: insights from the stewardship of urban lakes in Bangalore, India. *Sustain. Sci.* **14**, 607–623 (2019).
170. Musakwa, W., Mpofu, E. & Nyathi, N. A. Local community perceptions on landscape change, ecosystem services, climate change, and livelihoods in Gonarezhou national park, Zimbabwe. *Sustain.* **12**, (2020).
171. Narducci, J., Quintas-Soriano, C., Castro, A., Som-Castellano, R. & Brandt, J. S. J. S. Implications of urban growth and farmland loss for ecosystem services in the western United States. *Land use policy* **86**, 1–11 (2019).
172. Nath, T. K., Zhe Han, S. S. & Lechner, A. M. Urban green space and wellbeing in Kuala Lumpur, Malaysia. *Urban For. Urban Green.* **36**, 34–41 (2018).
173. Nettleton, C. *et al.* Utz wachil: Findings from an international study of indigenous perspectives on health and environment. *Ecohealth* **4**, 461–471 (2007).
174. Ngiam, R. W. J. R. W. J., Lim, W. L. W. L. & Matilda Collins, C. A balancing act in urban social-ecology: human appreciation, ponds and dragonflies. *Urban Ecosyst.* **20**, 743–758 (2017).
175. Nikodinoska, N., Paletto, A., Franzese, P. P. & Jonasson, C. Valuation of ecosystem services in protected areas: The case of the Abisko National Park (Sweden). *J. Environ. Account. Manag.* **3**, 355–369 (2015).
176. Nystad, K., Spein, A. R. & Ingstad, B. Community resilience factors among indigenous Sámi adolescents: A qualitative study in Northern Norway. *Transcult. Psychiatry* **51**, 651–672 (2014).
177. O’Brien, L., Morris, J. & Stewart, A. Engaging with peri-urban woodlands in England: The contribution to people’s health and wellbeing and implications for future management. *Int. J. Environ. Res. Public Health* **11**, 6171–6192 (2014).
178. Ode Sang, Å., Knez, I., Gunnarsson, B. & Hedblom, M. The effects of naturalness, gender, and age on how urban green space is perceived and used. *Urban For. Urban Green.* **18**, 268–276 (2016).
179. Olah, B., Kunca, V. & Gallay, I. Assessing the potential of forest stands for ectomycorrhizal mushrooms as a subsistence ecosystem service for socially disadvantaged people: A case study from central Slovakia. *Forests* **11**, (2020).
180. Ordóñez, C. & Duinker, P. N. N. Urban Forest Values of the Citizenry in Three Colombian Cities. *Soc. Nat. Resour.* **27**, 834–849 (2014).
181. Ortiz, M. S. O. M. S. O. & Geneletti, D. Assessing mismatches in the provision of urban ecosystem services to support spatial planning: A case study on recreation and food supply in Havana, Cuba. *Sustain.* **10**, (2018).
182. Oteros-Rozas, E. *et al.* Socio-cultural valuation of ecosystem services in a transhumance social-ecological network. *Reg. Environ. Chang.* **14**, 1269–1289 (2014).
183. Oteros-Rozas, E., Martín-López, B., Fagerholm, N., Bieling, C. & Plieninger, T. Using social media photos to explore the relation between cultural ecosystem services and landscape features across five European sites. *Ecol. Indic.* **94**, 74–86 (2018).

184. Othman, J. & Jafari, Y. Economic valuation of an urban lake recreational park: Case of Taman Tasik Cempaka in Bandar Baru Bangi, Malaysia. *Sustain.* **11**, (2019).
185. Ouédraogo, I., Nacoulma, B. M. I., Hahn, K. & Thiombiano, A. Assessing ecosystem services based on indigenous knowledge in south-eastern Burkina Faso (West Africa). *Int. J. Biodivers. Sci. Ecosyst. Serv. Manag.* **10**, 313–321 (2014).
186. Paletto, A., De Meo, I., Grilli, G. & Nikodinoska, N. Effects of different thinning systems on the economic value of ecosystem services: A case-study in a black pine peri-urban forest in Central Italy. *Ann. For. Res.* **60**, 313–326 (2017).
187. Palliwoda, J., Banzhaf, E. & Priess, J. A. How do the green components of urban green infrastructure influence the use of ecosystem services? Examples from Leipzig, Germany. *Landsc. Ecol.* **35**, 1127–1142 (2020).
188. Palliwoda, J., Kowarik, I. & von der Lippe, M. Human-biodiversity interactions in urban parks: The species level matters. *Landsc. Urban Plan.* **157**, 394–406 (2017).
189. Palta, M., du Bray, M. V., Stotts, R., Wolf, A. & Wutich, A. Ecosystem services and disservices for a vulnerable population: Findings from urban waterways and wetlands in an American desert city. *Hum. Ecol.* **44**, 463–478 (2016).
190. Parlee, B., Berkes, F. & Gwich'in, T. Health of the land, health of the people: A case study on Gwich'in Berry harvesting in Northern Canada. *Ecohealth* **2**, 127–137 (2005).
191. Pascua, P., McMillen, H., Ticktin, T., Vaughan, M. & Winter, K. B. Beyond services: A process and framework to incorporate cultural, genealogical, place-based, and indigenous relationships in ecosystem service assessments. *Ecosyst. Serv.* **26**, 465–475 (2017).
192. Pedersen, E., Weisner, S. E. B. S. E. B. & Johansson, M. Wetland areas' direct contributions to residents' wellbeing entitle them to high cultural ecosystem values. *Sci. Total Environ.* **646**, 1315–1326 (2019).
193. Perez, M. A. & Longboat, S. Our Shared Relationship with Land and Water: Perspectives from the Mayangna and the Anishinaabe. *Ecopsychology* **11**, 191–198 (2019).
194. Petch, N., Maguire, G. S., Schlacher, T. A. & Weston, M. A. Motivations and behavior of off-road drivers on sandy beaches. *Ocean Coast. Manag.* **163**, 82–91 (2018).
195. Petz, K., Minca, E. L., Werners, S. E. & Leemans, R. Managing the current and future supply of ecosystem services in the Hungarian and Romanian Tisza River Basin. *Reg. Environ. Chang.* **12**, 689–700 (2012).
196. Phaneuf, D. J., Smith, V. K., Palmquist, R. B. & Pope, J. C. Integrating property value and local recreation models to value ecosystem services in urban watersheds. *Land Econ.* **84**, 361–381 (2008).
197. Pike, K., Wright, P., Wink, B. & Fletcher, S. The assessment of cultural ecosystem services in the marine environment using Q methodology. *J. Coast. Conserv.* **19**, 667–675 (2015).
198. Pilogallo, A. *et al.* Geotourism as a Specialization in the Territorial Context of the Basilicata Region (Southern Italy). *Geoheritage* **11**, 1435–1445 (2019).
199. Piñeiro-Corbeira, C., Barreiro, R., Olmedo, M. & De la Cruz-Modino, R. Recreational snorkeling activities to enhance seascape enjoyment and environmental education in the Islas Atlánticas de Galicia National Park (Spain). *J. Environ. Manage.* **272**, (2020).
200. Pittman, S. J. *et al.* Marine parks for coastal cities: A concept for enhanced community wellbeing, prosperity and sustainable city living. *Mar. Policy* **103**, 160–171 (2019).
201. Plieninger, T., Dijks, S., Oteros-Rozas, E. & Bieling, C. Assessing, mapping, and quantifying cultural ecosystem services at community level. *Land use policy* **33**, 118–129 (2013).
202. Plieninger, T., Ferranto, S., Huntsinger, L., Kelly, M. & Getz, C. Appreciation, use, and management of biodiversity and ecosystem services in California's working landscapes. *Environ. Manage.* **50**, 427–440 (2012).
203. Poe, M. R. M. R. M. R., Donatuto, J. & Satterfield, T. "Sense of Place": Human Wellbeing Considerations for Ecological Restoration in Puget Sound. *Coast. Manag.* **44**, 409–426 (2016).

204. Polat, Z., Kiliçaslan, C., Kara, B. & Deniz, B. Visual quality assessment of trees and shrubs in the south campus of Adnan Menderes university in spring. *Fresenius Environ. Bull.* **24**, 4303–4315 (2015).
205. Pouso, S., Uyarra, M. C. & Borja, Á. The recovery of estuarine quality and the perceived increase of cultural ecosystem services by beach users: A case study from northern Spain. *J. Environ. Manage.* **212**, 450–461 (2018).
206. Quintas-Soriano, C., Castro, A. J., Castro, H. & García-Llorente, M. Impacts of land use change on ecosystem services and implications for human wellbeing in Spanish drylands. *Land use policy* **54**, 534–548 (2016).
207. Rabe, S.-E., Gantenbein, R., Richter, K.-F. & Grêt-Regamey, A. Increasing the credibility of expert-based models with preference surveys – Mapping recreation in the riverine zone. *Ecosyst. Serv.* **31**, 308–317 (2018).
208. Radford, K. G. & James, P. Changes in the value of ecosystem services along a rural-urban gradient: A case study of Greater Manchester, UK. *Landsc. Urban Plan.* **109**, 117–127 (2013).
209. Rafiee, R., Salman Mahiny, A. & Khorasani, N. Assessment of changes in urban green spaces of Mashad city using satellite data. *Int. J. Appl. Earth Obs. Geoinf.* **11**, 431–438 (2009).
210. Rahman, M. M. M. M., Jiang, Y. & Irvine, K. Assessing wetland services for improved development decision-making: a case study of mangroves in coastal Bangladesh. *Wetl. Ecol. Manag.* **26**, 563–580 (2018).
211. Rall, E., Hansen, R. & Pauleit, S. The added value of public participation GIS (PPGIS) for urban green infrastructure planning. *Urban For. Urban Green.* **40**, 264–274 (2019).
212. Rathmann, J. *et al.* Towards quantifying forest recreation: Exploring outdoor thermal physiology and human wellbeing along exemplary pathways in a central European urban forest (Augsburg, SE-Germany). *Urban For. Urban Green.* **49**, (2020).
213. Raymond, C. M. C. M., Diduck, A. P. A. P., Buijs, A., Boerchers, M. & Moquin, R. Exploring the co-benefits (and costs) of home gardening for biodiversity conservation. *Local Environ.* **24**, 258–273 (2019).
214. Rees, S. E. S. E. *et al.* The socio-economic effects of a Marine Protected Area on the ecosystem service of leisure and recreation. *Mar. Policy* **62**, 144–152 (2015).
215. Retka, J. *et al.* Assessing cultural ecosystem services of a large marine protected area through social media photographs. *Ocean Coast. Manag.* **176**, 40–48 (2019).
216. Richards, D. R. D. R. *et al.* Demographic biases in engagement with nature in a tropical Asian city. *PLoS One* **15**, (2020).
217. Riechers, M. *et al.* Perceptions of cultural ecosystem services from urban green. *Ecosyst. Serv.* **17**, 33–39 (2016).
218. Robinson, C. J., James, G. & Whitehead, P. J. Negotiating Indigenous benefits from payment for ecosystem service (PES) schemes. *Glob. Environ. Chang.* **38**, 21–29 (2016).
219. Rodríguez-Loinaz, G., Peña, L., Palacios-Agundez, I., Ametzaga-Arregi, I. & Onaindia, M. Identifying green infrastructure as a basis for an incentive mechanism at the municipality level in biscay (basque country). *Forests* **9**, (2018).
220. Rodríguez-Rodríguez, D., Kain, J. H. H., Haase, D., Baró, F. & Kaczorowska, A. Urban self-sufficiency through optimised ecosystem service demand. A utopian perspective from European cities. *Futures* **70**, 13–23 (2015).
221. Romero-Díaz, A., de Vente, J. & Díaz-Pereira, E. Assessment of the ecosystem services provided by agricultural terraces. *Pirineos* **174**, (2019).
222. Romolini, M., Ryan, R. L., Simso, E. R. & Strauss, E. G. Visitors' attachment to urban parks in Los Angeles, CA. *Urban For. Urban Green.* **41**, 118–126 (2019).
223. Rosehan, N. S., Abas, A. & Aiyub, K. Studies on the cultural ecosystem services in malacca city. *Plan. Malaysia* **18**, 133–144 (2020).

224. Rozos, E., Makropoulos, C. & Maksimović, Č. Rethinking urban areas: An example of an integrated blue-green approach. *Water Sci. Technol. Water Supply* **13**, 1534–1542 (2013).
225. Russell, K. C. & Harris, C. Dimensions of community autonomy in timber towns in the inland northwest. *Soc. Nat. Resour.* **14**, 21–38 (2001).
226. Russell, R. *et al.* *Humans and nature: How knowing and experiencing nature affect wellbeing. Annual Review of Environment and Resources* vol. 38 (2013).
227. Saarikoski, H. *et al.* Exploring operational ecosystem service definitions: The case of boreal forests. *Ecosyst. Serv.* **14**, 144–157 (2015).
228. Salem, M. M. & El-Shimy, H. Sustainable tourism within an eco-city context: Analytical study for the master plan of Siwa ity, Egypt. *WIT Trans. Ecol. Environ.* **165**, 3–14 (2012).
229. Samal, P. K., Palni, L. M. S. & Agrawal, D. K. Ecology, ecological poverty and sustainable development in Central Himalayan region of India. *Int. J. Sustain. Dev. World Ecol.* **10**, 157–168 (2003).
230. Sangha, K. K. & Russell-Smith, J. Towards an Indigenous Ecosystem Services Valuation Framework: A North Australian Example. *Conserv. Soc.* **15**, 255–269 (2017).
231. Sannigrahi, S. *et al.* Ecosystem service value assessment of a natural reserve region for strengthening protection and conservation. *J. Environ. Manage.* **244**, 208–227 (2019).
232. Santos-Martín, F. *et al.* Unraveling the Relationships between Ecosystems and Human Wellbeing in Spain. *PLoS One* **8**, (2013).
233. Säumel, I., Reddy, S. E. & Wachtel, T. Edible city solutions-one step further to foster social resilience through enhanced socio-cultural ecosystem services in cities. *Sustain.* **11**, (2019).
234. Schebella, M. F., Weber, D., Schultz, L. & Weinstein, P. The nature of reality: Human stress recovery during exposure to biodiverse, multisensory virtual environments. *Int. J. Environ. Res. Public Health* **17**, (2020).
235. Schirpke, U., Altzinger, A., Leitinger, G. & Tasser, E. Change from agricultural to touristic use: Effects on the aesthetic value of landscapes over the last 150 years. *Landsc. Urban Plan.* **187**, 23–35 (2019).
236. Schirpke, U., Marino, D., Marucci, A. & Palmieri, M. Positive effects of payments for ecosystem services on biodiversity and socio-economic development: Examples from Natura 2000 sites in Italy. *Ecosyst. Serv.* **34**, 96–105 (2018).
237. Schirpke, U., Meisch, C., Marsoner, T. & Tappeiner, U. Revealing spatial and temporal patterns of outdoor recreation in the European Alps and their surroundings. *Ecosyst. Serv.* **31**, 336–350 (2018).
238. Schulp, C. J. E., Alkemade, R., Klein Goldewijk, K. & Petz, K. Mapping ecosystem functions and services in Eastern Europe using global-scale data sets. *Int. J. Biodivers. Sci. Ecosyst. Serv. Manag.* **8**, 156–168 (2012).
239. Sears, R. R. *et al.* Bhutan's forests through the framework of ecosystem services: Rapid assessment in three forest types. *Forests* **9**, (2018).
240. Shackleton, C. M. M. *et al.* How important is green infrastructure in small and medium-sized towns? Lessons from South Africa. *Landsc. Urban Plan.* **180**, 273–281 (2018).
241. Shackleton, R. T. Loss of land and livelihoods from mining operations: A case in the Limpopo Province, South Africa. *Land use policy* **99**, (2020).
242. Shafer, C. S., Lee, B. K. & Turner, S. A tale of three greenway trails: User perceptions related to quality of life. *Landsc. Urban Plan.* **49**, 163–178 (2000).
243. Sharma, G., Sharma, R. & Sharma, E. Traditional knowledge systems in large cardamom farming: Biophysical and management diversity in Indian mountainous regions. *Indian J. Tradit. Knowl.* **8**, 17–22 (2009).
244. Shwartz, A., Turbé, A., Simon, L. & Julliard, R. Enhancing urban biodiversity and its influence on city-dwellers: An experiment. *Biol. Conserv.* **171**, 82–90 (2014).
245. Sikorska, D., Sikorski, P. & Hopkins, R. J. R. J. High biodiversity of green infrastructure does not contribute to recreational ecosystem services. *Sustain.* **9**, (2017).

246. Singh, R. K. Ecoculture and subsistence living of Monpa community in the eastern Himalayas: An ethnoecological study in Arunachal Pradesh. *Indian J. Tradit. Knowl.* **12**, 441–453 (2013).
247. Smith, M. & Ram, Y. Tourism, landscapes and cultural ecosystem services: a new research tool. *Tour. Recreat. Res.* **42**, 113–119 (2017).
248. Soga, M., Gaston, K. J., Koyanagi, T. F., Kurisu, K. & Hanaki, K. Urban residents' perceptions of neighbourhood nature: Does the extinction of experience matter? *Biol. Conserv.* **203**, 143–150 (2016).
249. Soga, M., Tsuchiya, K., Evans, M. J. & Ishibashi, S. The inequalities of the extinction of experience: The role of personal characteristics and species traits in the distribution of people–plant interactions in Japan. *Ecol. Res.* **34**, 350–359 (2019).
250. Sonter, L. J. L. J., Watson, K. B. K. B., Wood, S. A. S. A. & Ricketts, T. H. T. H. Spatial and temporal dynamics and value of nature-based recreation, estimated via social media. *PLoS One* **11**, (2016).
251. Sonti, N. F., Campbell, L. K., Svendsen, E. S., Johnson, M. L. & Novem Auyeung, D. S. Fear and fascination: Use and perceptions of New York City's forests, wetlands, and landscaped park areas. *Urban For. Urban Green.* **49**, (2020).
252. Southon, G. E., Jorgensen, A., Dunnett, N., Hoyle, H. & Evans, K. L. Perceived species-richness in urban green spaces: Cues, accuracy and wellbeing impacts. *Landsc. Urban Plan.* **172**, 1–10 (2018).
253. Soy-Massoni, E. *et al.* Societal benefits from agricultural landscapes in Girona, Catalonia. *Outlook Agric.* **45**, 100–110 (2016).
254. Soy-Massoni, E., Langemeyer, J., Varga, D., Sáez, M. & Pintó, J. The importance of ecosystem services in coastal agricultural landscapes: Case study from the Costa Brava, Catalonia. *Ecosyst. Serv.* **17**, 43–52 (2016).
255. Spanou, E., Kenter, J. O. & Graziano, M. The Effects of Aquaculture and Marine Conservation on Cultural Ecosystem Services: An Integrated Hedonic – Eudaemonic Approach. *Ecol. Econ.* **176**, (2020).
256. Steinhäuser, C. Mountain farmers' intangible values foster agroecological landscapes: case studies from Sierra Santa Victoria in northwest Argentina and the Ladin Dolomites, northern Italy. *Agroecol. Sustain. Food Syst.* **44**, 352–377 (2020).
257. Suárez, M. *et al.* Environmental justice and outdoor recreation opportunities: A spatially explicit assessment in Oslo metropolitan area, Norway. *Environ. Sci. Policy* **108**, 133–143 (2020).
258. Sun, J. *et al.* Surplus or deficit? Spatiotemporal variations of the supply, demand, and budget of landscape services and landscape multifunctionality in suburban Shanghai, China. *Sustain.* **10**, (2018).
259. Surová, D., Ravera, F., Guiomar, N., Martínez Sastre, R. & Pinto-Correia, T. Contributions of Iberian Silvo-Pastoral Landscapes to the Wellbeing of Contemporary Society. *Rangel. Ecol. Manag.* **71**, 560–570 (2018).
260. Syrbe, R.-U. & Walz, U. Spatial indicators for the assessment of ecosystem services: Providing, benefiting and connecting areas and landscape metrics. *Ecol. Indic.* **21**, 80–88 (2012).
261. Taff, B. D. D., Benfield, J., Miller, Z. D. Z. D., D'antonio, A. & Schwartz, F. The role of tourism impacts on cultural ecosystem services. *Environ. - MDPI* **6**, (2019).
262. Takase, Y., Hadi, A. A. & Furuya, K. The Relationship Between Volunteer Motivations and Variation in Frequency of Participation in Conservation Activities. *Environ. Manage.* **63**, 32–45 (2019).
263. Tauro, A., Gómez-Baggethun, E., García-Frapolli, E., Chavero, E. L. & Balvanera, P. Unraveling heterogeneity in the importance of ecosystem services: Individual views of smallholders. *Ecol. Soc.* **23**, (2018).
264. Tawil, M., Utku, Y., Alrayyan, K. & Reicher, C. Revierparks as an integrated green network in Germany: An option for Amman? *PLoS One* **14**, (2019).

265. Tedesco, L. P. & Salazar, K. A. Using environmental service learning in an urban environment to address water quality issues. *J. Geosci. Educ.* **54**, 123–132 (2006).
266. Thierry de Ville d'Avray, L., Ami, D., Chenuil, A., David, R. & Féral, J.-P. Application of the ecosystem service concept at a small-scale: The cases of coralligenous habitats in the North-western Mediterranean Sea. *Mar. Pollut. Bull.* **138**, 160–170 (2019).
267. Toledo, D., Briceño, T. & Ospina, G. Ecosystem service valuation framework applied to a legal case in the Anchicaya region of Colombia. *Ecosyst. Serv.* **29**, 352–359 (2018).
268. Trabucchi, M., Comín, F. A. & O'Farrell, P. J. Hierarchical priority setting for restoration in a watershed in NE Spain, based on assessments of soil erosion and ecosystem services. *Reg. Environ. Chang.* **13**, 911–926 (2013).
269. Tribot, A. S. A.-S. *et al.* Taxonomic and functional diversity increase the aesthetic value of coralligenous reefs. *Sci. Rep.* **6**, (2016).
270. Tsiantikoudis, S., Arabatzis, G., Kokkinakis, A. K. & Pechlivanis, E.-F. Water resources, quality of life and threats. The case of the evros prefecture (Greece). *J. Environ. Prot. Ecol.* **13**, 325–330 (2012).
271. Tu, X., Huang, G. & Wu, J. Contrary to common observations in the west, urban park access is only weakly related to neighborhood socioeconomic conditions in Beijing, China. *Sustain.* **10**, (2018).
272. Turner, P. J., Thaler, A. D., Freitag, A. & Colman Collins, P. Deep-sea hydrothermal vent ecosystem principles: Identification of ecosystem processes, services and communication of value. *Mar. Policy* **101**, 118–124 (2019).
273. Urquhart, J. *et al.* Awareness, concern and willingness to adopt biosecure behaviours: public perceptions of invasive tree pests and pathogens in the UK. *Biol. Invasions* **19**, 2567–2582 (2017).
274. Vail, D. & Heldt, T. Governing snowmobilers in multiple-use landscapes: Swedish and Maine (USA) cases. *Ecol. Econ.* **48**, 469–483 (2004).
275. Vallecillo, S., La Notte, A., Zulian, G., Ferrini, S. & Maes, J. Ecosystem services accounts: Valuing the actual flow of nature-based recreation from ecosystems to people. *Ecol. Modell.* **392**, 196–211 (2019).
276. Van Berkel, D. B. D. B. *et al.* Quantifying the visual-sensory landscape qualities that contribute to cultural ecosystem services using social media and LiDAR. *Ecosyst. Serv.* **31**, 326–335 (2018).
277. Van Riper, C. J. C. J. & Kyle, G. T. G. T. Capturing multiple values of ecosystem services shaped by environmental worldviews: A spatial analysis. *J. Environ. Manage.* **145**, 374–384 (2014).
278. Völker, S. & Kistemann, T. 'I'm always entirely happy when I'm here!' Urban blue enhancing human health and wellbeing in Cologne and Düsseldorf, Germany. *Soc. Sci. Med.* **78**, 113–124 (2013).
279. Von Maltitz, G. P., Gasparatos, A., Fabricius, C., Morris, A. & Willis, K. J. *Jatropha* cultivation in Malawi and Mozambique: Impact on ecosystem services, local human wellbeing, and poverty alleviation. *Ecol. Soc.* **21**, (2016).
280. Walsh, F. J., Dobson, P. V. & Douglas, J. C. Anpernirrentye: A framework for enhanced application of indigenous ecological knowledge in natural resource management. *Ecol. Soc.* **18**, (2013).
281. Waluyo, H., Sadikin, S. R., Gustami & Whiting, P. An economic valuation of biodiversity in the karst area of maros, south sulawesi, indonesia. *Biodiversity* **6**, 24–26 (2005).
282. Wang, B., Tang, H. & Xu, Y. Integrating ecosystem services and human wellbeing into management practices: Insights from a mountain-basin area, China. *Ecosyst. Serv.* **27**, 58–69 (2017).



283. Wang, B., Tang, H., Zhang, Q. & Cui, F. Exploring connections among ecosystem services supply, demand and human wellbeing in a mountain-basin system, China. *Int. J. Environ. Res. Public Health* **17**, 1–15 (2020).
284. Wangai, P. W., Burkhard, B., Kruse, M. & Müller, F. Contributing to the cultural ecosystem services and human wellbeing debate: A case study application on indicators and linkages. *Landsc. Online* **50**, 1–27 (2017).
285. Wasilewski, M., Szulczewska, B. & Giedych, R. Visitors' perception of urban nature reserves in Poland. *Sustain.* **11**, (2019).
286. Weyland, F. & Laterra, P. Recreation potential assessment at large spatial scales: A method based in the ecosystem services approach and landscape metrics. *Ecol. Indic.* **39**, 34–43 (2014).
287. Willemse, L. A class-differentiated analysis of park use in Cape Town, South Africa. *GeoJournal* **83**, 915–934 (2018).
288. Willis, C. The contribution of cultural ecosystem services to understanding the tourism-nature-wellbeing nexus. *J. Outdoor Recreat. Tour.* **10**, 38–43 (2015).
289. Willis, C., Papathanasopoulou, E., Russel, D. & Artioli, Y. Harmful algal blooms: the impacts on cultural ecosystem services and human wellbeing in a case study setting, Cornwall, UK. *Mar. Policy* **97**, 232–238 (2018).
290. Xu, Z. *et al.* Relationships between ecosystem services and human wellbeing changes based on carbon flow—A case study of the Manas River Basin, Xinjiang, China. *Ecosyst. Serv.* **37**, (2019).
291. Yang, S., Zhao, W., Pereira, P. & Liu, Y. Socio-cultural valuation of rural and urban perception on ecosystem services and human wellbeing in Yanhe watershed of China. *J. Environ. Manage.* **251**, (2019).
292. Ye, Y. *et al.* Changes in land-use and ecosystem services in the Guangzhou-Foshan Metropolitan Area, China from 1990 to 2010: Implications for sustainability under rapid urbanization. *Ecol. Indic.* **93**, 930–941 (2018).
293. Yen, Y. *et al.* The predictors of the behavioral intention to the use of urban green spaces: The perspectives of young residents in Phnom Penh, Cambodia. *Habitat Int.* **64**, 98–108 (2017).
294. Yli-Pelkonen, V., Pispä, K. & Helle, I. The role of stream ecosystems in urban planning: A case study from the stream Rekolanjoja in Finland. *Manag. Environ. Qual. An Int. J.* **17**, 673–688 (2006).
295. Zank, S., Peroni, N., de Araújo, E. L. E. L. & Hanazaki, N. Local health practices and the knowledge of medicinal plants in a Brazilian semi-arid region: Environmental benefits to human health. *J. Ethnobiol. Ethnomed.* **11**, (2015).
296. Zhang, S. & Zhou, W. Recreational visits to urban parks and factors affecting park visits: Evidence from geotagged social media data. *Landsc. Urban Plan.* **180**, 27–35 (2018).
297. Zhao, M., Peng, J., Liu, Y., Li, T. & Wang, Y. Mapping Watershed-Level Ecosystem Service Bundles in the Pearl River Delta, China. *Ecol. Econ.* **152**, 106–117 (2018).
298. Zheng, D. *et al.* Spatial-temporal variation and tradeoffs/synergies analysis on multiple ecosystem services: A case study in the Three-River Headwaters region of China. *Ecol. Indic.* **116**, (2020).
299. Zhou, T., Koomen, E. & van Leeuwen, E. S. E. S. Residents' preferences for cultural services of the landscape along the urban–rural gradient. *Urban For. Urban Green.* **29**, 131–141 (2018).
300. Zin, W. S. W. S., Suzuki, A., Peh, K. S. H. K. S.-H. & Gasparatos, A. Economic value of cultural ecosystem services from recreation in popa mountain national park, myanmar: A comparison of two rapid valuation techniques. *Land* **8**, (2019).
301. Zulma Duran, H., Heliodoro Arguello, A. & Tapasco, J. A methodological approach for the non-monetary valuation of ecosystem services in three communities of the Colombian

Amazon | Una aproximación metodológica para la valoración no monetaria de servicios ecosistémicos en tres comunidades de la Amazonia Colom. *Agron. Colomb.* **34**, 109–120 (2016).
